# Supplementary material for: drLumi: An open-source package to manage data, calibrate, and conduct quality control of multiplex bead-based immunoassays data analysis
Source: PubMed Central journal article supplement (PMC5685631; doi:10.1371/journal.pone.0187901), 2017-11-14

---

# QA/QC results for week 5

Background subtract data and flag applied

CRESIB

13th May 2014

# Contents

|          |                                                                                         |           |
|----------|-----------------------------------------------------------------------------------------|-----------|
| <b>1</b> | <b>Summary</b>                                                                          | <b>4</b>  |
| <b>2</b> | <b>Distribution of limits of quantification and detection</b>                           | <b>5</b>  |
| 2.1      | Minimum LLOD (MFI information) by day of the week . . . . .                             | 5         |
| 2.2      | Maximum HLOD (MFI information) by day of the week . . . . .                             | 6         |
| 2.3      | Maximum HLOD (MFI information) by day of the week query . . . . .                       | 7         |
| 2.4      | Summary LLOD and HLOD (MFI information) over the week . . . . .                         | 8         |
| 2.5      | Minimum LLOQ (MFI information) by day . . . . .                                         | 9         |
| 2.6      | Maximum HLOQ (MFI information) by day . . . . .                                         | 10        |
| 2.7      | Summary LLOQ and HLOQ (MFI information) over the week . . . . .                         | 11        |
| 2.8      | Minimum LLOQ (concentration information) by day . . . . .                               | 12        |
| 2.9      | Maximum HLOQ (concentration information) by day . . . . .                               | 13        |
| 2.10     | Summary LLOQ and HLOQ (concentration information) over the week . . . . .               | 14        |
| <b>3</b> | <b>Sample quality plots.</b>                                                            | <b>15</b> |
| 3.1      | PHA-DMSO ratio by analyte and site (MFI information) . . . . .                          | 15        |
| 3.2      | PHA-DMSO ratio values query . . . . .                                                   | 16        |
| <b>4</b> | <b>Distribution of outliers</b>                                                         | <b>17</b> |
| 4.1      | Number of flags identified by plate . . . . .                                           | 17        |
| 4.2      | Number of flags identified by day . . . . .                                             | 18        |
| 4.3      | Number of outliers identified after flag by plate . . . . .                             | 19        |
| 4.4      | Number of outliers identified after flag by day . . . . .                               | 20        |
| <b>5</b> | <b>Qualification and fitness of Standard Curve</b>                                      | <b>21</b> |
| <b>6</b> | <b>Operator assesment</b>                                                               | <b>22</b> |
| 6.1      | Intra-operator agreement . . . . .                                                      | 22        |
| 6.1.1    | Intraclass Correlation Coefficient (agreement) results by operator . . . . .            | 22        |
| 6.1.2    | Intraclass Correlation Coefficient (agreement) query . . . . .                          | 23        |
| 6.2      | Inter-operator agreement . . . . .                                                      | 24        |
| 6.2.1    | Intraclass Correlation Coefficient (agreement) results across operators . . . . .       | 24        |
| 6.2.2    | Intraclass Correlation Coefficient (agreement) results across operators query . . . . . | 25        |
| 6.3      | LLOD and HLOD (MFI information) . . . . .                                               | 26        |
| 6.3.1    | Median values for LLOD and HLOD (MFI information) . . . . .                             | 26        |
| 6.3.2    | LLOD (MFI information) descriptives . . . . .                                           | 27        |
| 6.3.3    | HLOD (MFI information) descriptives . . . . .                                           | 28        |
| 6.4      | LLOQ and HLOQ (MFI information) . . . . .                                               | 29        |
| 6.4.1    | Median values for LLOQ and HLOQ (MFI information) . . . . .                             | 29        |
| 6.4.2    | LLOQ (MFI information) descriptives . . . . .                                           | 30        |
| 6.4.3    | HLOQ (MFI information) descriptives . . . . .                                           | 31        |
| 6.5      | LLOQ and HLOQ (concentration information) . . . . .                                     | 32        |
| 6.5.1    | Median values for LLOQ and HLOQ (concentration information) . . . . .                   | 32        |
| 6.5.2    | LLOQ (concentration information) descriptives . . . . .                                 | 33        |
| 6.5.3    | HLOQ (concentration information) descriptives . . . . .                                 | 34        |
| <b>7</b> | <b>Assay random and systematic variability</b>                                          | <b>35</b> |
| 7.1      | Mean concentration for controls by plate and analyte . . . . .                          | 35        |
| 7.2      | Coefficient of variation by day . . . . .                                               | 38        |
| 7.3      | Coefficient of variation by operator . . . . .                                          | 39        |
| 7.4      | Coefficient of variation query . . . . .                                                | 40        |
| 7.5      | Agreement for positive controls . . . . .                                               | 41        |

|                                                                              |           |
|------------------------------------------------------------------------------|-----------|
| <b>8 Annex</b>                                                               | <b>43</b> |
| 8.1 Summary of queries by plate (taking into account all analytes) . . . . . | 43        |
| 8.2 CSP stimulated samples boxplots by analytes . . . . .                    | 44        |
| 8.3 CSP stimulated samples boxplots by analytes and plate . . . . .          | 45        |
| 8.4 Samples boxplots by analytes and stimulation . . . . .                   | 46        |
| 8.5 Samples boxplots by analytes query . . . . .                             | 47        |
| 8.6 Standard curve and Residuals plots by analyte and stimulation . . . . .  | 48        |

# 1 Summary

- Background method applied: subtract.
- Week: 5.
- Operators number: 3.
- Plates number: 3.

Distribution Operator/Plate:

|   | m067_37 | m067_38 | m067_39 | m067_40 | m067_41 | m067_42 | m067_43 | m067_44 | m067_45 |
|---|---------|---------|---------|---------|---------|---------|---------|---------|---------|
| 1 | 1       | 0       | 0       | 1       | 0       | 0       | 1       | 0       | 0       |
| 2 | 0       | 0       | 1       | 0       | 1       | 0       | 0       | 1       | 0       |
| 4 | 0       | 1       | 0       | 0       | 0       | 1       | 0       | 0       | 1       |

## 2.4 Summary LLOD and HLOD (MFI information) over the week

|         | Blank |        |      | LLOD |        |      | HLOD  |        |       | N.Plates |
|---------|-------|--------|------|------|--------|------|-------|--------|-------|----------|
|         | Min   | Median | Max  | Min  | Median | Max  | Min   | Median | Max   |          |
| EGF     | 28.5  | 41.2   | 50.5 | 28.8 | 42.7   | 50.5 | 17090 | 22510  | 25000 | 9        |
| EOTAXIN | 19.0  | 28.5   | 37.0 | 20.0 | 28.5   | 37.0 | 20670 | 25000  | 25000 | 9        |
| FGF     | 18.5  | 26.0   | 32.5 | 19.9 | 26.5   | 32.5 | 5067  | 5799   | 7192  | 9        |
| G-CSF   | 6.0   | 7.0    | 10.0 | 6.5  | 8.0    | 11.0 | 12710 | 16660  | 20290 | 9        |
| GMCSF   | 5.0   | 6.0    | 7.5  | 5.0  | 6.0    | 7.5  | 25000 | 25000  | 25000 | 9        |
| HGF     | 7.0   | 8.5    | 10.0 | 8.0  | 8.9    | 11.0 | 25000 | 25000  | 25000 | 9        |
| IFNa    | 5.0   | 6.5    | 8.5  | 5.7  | 6.9    | 8.6  | 16520 | 20510  | 25000 | 9        |
| IFNg    | 5.0   | 6.5    | 8.5  | 5.5  | 7.0    | 8.5  | 25000 | 25000  | 25000 | 9        |
| IL10    | 6.5   | 8.0    | 9.5  | 6.5  | 8.0    | 9.5  | 25000 | 25000  | 25000 | 9        |
| IL12    | 6.0   | 7.0    | 9.0  | 6.0  | 8.0    | 10.0 | 20940 | 25000  | 25000 | 9        |
| IL13    | 6.5   | 8.0    | 10.0 | 6.8  | 8.8    | 10.7 | 18300 | 25000  | 25000 | 9        |
| IL15    | 22.5  | 29.8   | 42.5 | 22.7 | 29.8   | 42.5 | 5992  | 6989   | 25000 | 9        |
| IL17    | 9.5   | 11.5   | 15.5 | 9.5  | 11.6   | 15.5 | 25000 | 25000  | 25000 | 9        |
| IL1B    | 19.8  | 25.0   | 31.0 | 20.9 | 26.0   | 31.0 | 15940 | 23510  | 25000 | 9        |
| IL1RA   | 42.8  | 58.0   | 81.5 | 42.8 | 60.0   | 81.5 | 8995  | 14140  | 25000 | 9        |
| IL2     | 13.0  | 17.2   | 22.0 | 13.2 | 17.3   | 22.0 | 25000 | 25000  | 25000 | 9        |
| IL2R    | 8.0   | 10.0   | 13.5 | 9.0  | 11.0   | 13.5 | 25000 | 25000  | 25000 | 9        |
| IL4     | 7.5   | 9.0    | 11.0 | 7.6  | 9.1    | 11.1 | 19780 | 25000  | 25000 | 9        |
| IL5     | 5.0   | 6.0    | 7.5  | 5.0  | 6.0    | 7.5  | 25000 | 25000  | 25000 | 9        |
| IL6     | 12.5  | 16.5   | 21.5 | 12.5 | 16.7   | 21.5 | 25000 | 25000  | 25000 | 9        |
| IL7     | 32.5  | 43.0   | 55.2 | 32.5 | 43.8   | 55.2 | 18420 | 25000  | 25000 | 9        |
| IL8     | 50.0  | 65.0   | 94.5 | 50.6 | 65.1   | 94.5 | 15630 | 25000  | 25000 | 9        |
| IP10    | 6.0   | 7.0    | 9.8  | 6.5  | 8.0    | 10.6 | 23680 | 25000  | 25000 | 9        |
| MCP1    | 11.0  | 13.5   | 19.0 | 12.0 | 13.5   | 20.8 | 25000 | 25000  | 25000 | 9        |
| MIG     | 5.5   | 6.5    | 9.5  | 5.9  | 7.2    | 9.5  | 25000 | 25000  | 25000 | 9        |
| MIP1A   | 7.0   | 10.0   | 12.0 | 7.9  | 10.0   | 13.0 | 9884  | 10850  | 13590 | 9        |
| MIP1B   | 11.5  | 14.2   | 20.0 | 12.3 | 15.2   | 20.1 | 25000 | 25000  | 25000 | 9        |
| RANTES  | 48.5  | 58.5   | 74.5 | 51.0 | 59.8   | 74.5 | 8437  | 9008   | 10560 | 9        |
| TNFa    | 6.0   | 8.5    | 10.5 | 6.0  | 8.5    | 10.5 | 25000 | 25000  | 25000 | 9        |
| VEGF    | 37.0  | 49.5   | 60.8 | 38.0 | 49.5   | 61.2 | 8442  | 9676   | 15650 | 9        |

## 4 Distribution of outliers

### 4.1 Number of flags identified by plate

|         | m067_37 | m067_38 | m067_39 | m067_40 | m067_41 | m067_42 | m067_43 | m067_44 | m067_45 |
|---------|---------|---------|---------|---------|---------|---------|---------|---------|---------|
| EGF     | 1       | 0       | 0       | 1       | 1       | 0       | 0       | 0       | 0       |
| EOTAXIN | 0       | 0       | 0       | 0       | 0       | 0       | 0       | 0       | 0       |
| FGF     | 0       | 0       | 0       | 0       | 0       | 0       | 0       | 0       | 0       |
| G-CSF   | 0       | 0       | 0       | 0       | 0       | 1       | 0       | 0       | 0       |
| GMCSF   | 0       | 0       | 0       | 0       | 0       | 0       | 0       | 0       | 0       |
| HGF     | 0       | 0       | 0       | 0       | 0       | 0       | 0       | 0       | 0       |
| IFNa    | 0       | 0       | 0       | 0       | 0       | 0       | 0       | 0       | 0       |
| IFNg    | 0       | 0       | 1       | 0       | 0       | 1       | 1       | 1       | 1       |
| IL10    | 0       | 0       | 0       | 0       | 0       | 0       | 0       | 0       | 0       |
| IL12    | 0       | 0       | 1       | 0       | 0       | 0       | 0       | 0       | 0       |
| IL13    | 0       | 0       | 0       | 0       | 1       | 1       | 0       | 0       | 0       |
| IL15    | 0       | 1       | 0       | 0       | 0       | 0       | 0       | 0       | 0       |
| IL17    | 0       | 0       | 0       | 0       | 0       | 0       | 0       | 0       | 0       |
| IL1B    | 0       | 0       | 0       | 0       | 1       | 1       | 0       | 0       | 0       |
| IL1RA   | 0       | 0       | 1       | 0       | 0       | 0       | 0       | 0       | 0       |
| IL2     | 0       | 1       | 0       | 0       | 1       | 0       | 0       | 1       | 0       |
| IL2R    | 0       | 0       | 0       | 0       | 0       | 0       | 0       | 0       | 0       |
| IL4     | 0       | 1       | 0       | 0       | 1       | 0       | 1       | 0       | 0       |
| IL5     | 0       | 0       | 0       | 0       | 0       | 0       | 0       | 0       | 0       |
| IL6     | 0       | 0       | 0       | 0       | 0       | 0       | 0       | 0       | 0       |
| IL7     | 0       | 0       | 0       | 0       | 0       | 0       | 0       | 0       | 0       |
| IL8     | 0       | 1       | 0       | 0       | 0       | 1       | 0       | 0       | 0       |
| IP10    | 0       | 0       | 0       | 0       | 1       | 0       | 0       | 0       | 0       |
| MCP1    | 0       | 1       | 0       | 1       | 0       | 0       | 0       | 0       | 0       |
| MIG     | 0       | 0       | 0       | 0       | 0       | 0       | 0       | 0       | 0       |
| MIP1A   | 1       | 0       | 1       | 0       | 1       | 0       | 0       | 1       | 0       |
| MIP1B   | 1       | 0       | 1       | 1       | 0       | 0       | 0       | 0       | 0       |
| RANTES  | 0       | 1       | 0       | 0       | 0       | 0       | 0       | 0       | 0       |
| TNFa    | 0       | 1       | 0       | 0       | 0       | 0       | 0       | 0       | 0       |
| VEGF    | 1       | 0       | 0       | 0       | 1       | 1       | 0       | 0       | 0       |

## 4.3 Number of outliers identified after flag by plate

|         | m067_37 | m067_38 | m067_39 | m067_40 | m067_41 | m067_42 | m067_43 | m067_44 | m067_45 |
|---------|---------|---------|---------|---------|---------|---------|---------|---------|---------|
| EGF     | 0       | 0       | 0       | 0       | 0       | 0       | 0       | 0       | 0       |
| EOTAXIN | 0       | 0       | 0       | 0       | 0       | 0       | 0       | 0       | 0       |
| FGF     | 0       | 0       | 0       | 0       | 0       | 0       | 0       | 0       | 0       |
| G-CSF   | 0       | 0       | 0       | 0       | 0       | 0       | 0       | 0       | 0       |
| GMCSF   | 0       | 0       | 0       | 0       | 0       | 0       | 0       | 0       | 0       |
| HGF     | 0       | 0       | 0       | 0       | 0       | 0       | 0       | 0       | 0       |
| IFNa    | 0       | 0       | 0       | 0       | 0       | 0       | 0       | 0       | 0       |
| IFNg    | 0       | 0       | 0       | 0       | 0       | 0       | 0       | 0       | 0       |
| IL10    | 0       | 0       | 0       | 0       | 0       | 0       | 0       | 0       | 0       |
| IL12    | 0       | 0       | 0       | 0       | 0       | 0       | 0       | 0       | 0       |
| IL13    | 0       | 0       | 0       | 0       | 0       | 0       | 0       | 0       | 0       |
| IL15    | 0       | 0       | 0       | 0       | 0       | 0       | 0       | 0       | 0       |
| IL17    | 0       | 0       | 0       | 0       | 0       | 0       | 0       | 0       | 0       |
| IL1B    | 0       | 0       | 0       | 0       | 0       | 0       | 0       | 0       | 0       |
| IL1RA   | 0       | 0       | 0       | 0       | 0       | 0       | 0       | 0       | 0       |
| IL2     | 0       | 0       | 0       | 0       | 0       | 0       | 0       | 0       | 0       |
| IL2R    | 0       | 0       | 0       | 0       | 0       | 0       | 0       | 0       | 0       |
| IL4     | 0       | 0       | 0       | 0       | 0       | 0       | 0       | 0       | 0       |
| IL5     | 0       | 0       | 0       | 0       | 0       | 0       | 0       | 0       | 0       |
| IL6     | 0       | 0       | 0       | 0       | 0       | 0       | 0       | 0       | 0       |
| IL7     | 0       | 0       | 0       | 0       | 0       | 0       | 0       | 0       | 0       |
| IL8     | 0       | 0       | 0       | 0       | 0       | 0       | 0       | 0       | 0       |
| IP10    | 0       | 0       | 0       | 0       | 0       | 0       | 0       | 0       | 0       |
| MCP1    | 0       | 0       | 0       | 0       | 0       | 0       | 0       | 0       | 0       |
| MIG     | 0       | 0       | 0       | 0       | 0       | 0       | 0       | 0       | 0       |
| MIP1A   | 0       | 0       | 0       | 0       | 1       | 0       | 0       | 0       | 0       |
| MIP1B   | 0       | 0       | 0       | 0       | 0       | 0       | 0       | 0       | 0       |
| RANTES  | 0       | 0       | 0       | 0       | 0       | 0       | 0       | 0       | 0       |
| TNFa    | 0       | 0       | 0       | 0       | 0       | 0       | 0       | 0       | 0       |
| VEGF    | 0       | 0       | 0       | 0       | 0       | 0       | 0       | 0       | 0       |

## 5 Qualification and fitness of Standard Curve

| Analyte | N.Plates | $R^2 \leq 0.95$ | Mod.Fit $\leq 0.05$ | B pval $\leq 0.05$ | N.Convergence | N.LL5 conv. | N.LL4 conv. |
|---------|----------|-----------------|---------------------|--------------------|---------------|-------------|-------------|
| EGF     | 9        | 0               | 1                   | 9                  | 9             | 9           | 0           |
| EOTAXIN | 9        | 0               | 0                   | 9                  | 9             | 9           | 0           |
| FGF     | 9        | 0               | 0                   | 8                  | 9             | 9           | 0           |
| G-CSF   | 9        | 0               | 0                   | 9                  | 9             | 9           | 0           |
| GMCSF   | 9        | 0               | 0                   | 9                  | 9             | 9           | 0           |
| HGF     | 9        | 0               | 0                   | 8                  | 9             | 9           | 0           |
| IFNa    | 9        | 0               | 0                   | 9                  | 9             | 9           | 0           |
| IFNg    | 9        | 0               | 0                   | 9                  | 9             | 9           | 0           |
| IL10    | 9        | 0               | 0                   | 9                  | 9             | 9           | 0           |
| IL12    | 9        | 0               | 2                   | 8                  | 9             | 9           | 0           |
| IL13    | 9        | 0               | 0                   | 9                  | 9             | 8           | 1           |
| IL15    | 9        | 0               | 0                   | 6                  | 9             | 9           | 0           |
| IL17    | 9        | 0               | 0                   | 8                  | 9             | 9           | 0           |
| IL1B    | 9        | 0               | 0                   | 9                  | 9             | 9           | 0           |
| IL1RA   | 9        | 0               | 0                   | 8                  | 9             | 9           | 0           |
| IL2     | 9        | 0               | 0                   | 9                  | 9             | 9           | 0           |
| IL2R    | 9        | 0               | 0                   | 9                  | 9             | 9           | 0           |
| IL4     | 9        | 0               | 0                   | 9                  | 9             | 8           | 1           |
| IL5     | 9        | 0               | 0                   | 9                  | 9             | 9           | 0           |
| IL6     | 9        | 0               | 0                   | 8                  | 9             | 8           | 1           |
| IL7     | 9        | 0               | 0                   | 8                  | 9             | 9           | 0           |
| IL8     | 9        | 0               | 0                   | 8                  | 9             | 9           | 0           |
| IP10    | 9        | 0               | 0                   | 9                  | 9             | 8           | 1           |
| MCP1    | 9        | 0               | 1                   | 9                  | 9             | 9           | 0           |
| MIG     | 9        | 0               | 0                   | 7                  | 9             | 8           | 1           |
| MIP1A   | 9        | 0               | 0                   | 9                  | 9             | 9           | 0           |
| MIP1B   | 9        | 0               | 0                   | 9                  | 9             | 9           | 0           |
| RANTES  | 9        | 0               | 1                   | 9                  | 9             | 9           | 0           |
| TNFa    | 9        | 0               | 0                   | 9                  | 9             | 9           | 0           |
| VEGF    | 9        | 0               | 0                   | 8                  | 9             | 9           | 0           |



## 6 Operator assesment

### 6.1 Intra-operator agreement

#### 6.1.1 Intraclass Correlation Coefficient (agreement) results by operator

|         | Operator1 |       |         | Operator2 |       |         | Operator3 |       |         |
|---------|-----------|-------|---------|-----------|-------|---------|-----------|-------|---------|
|         | N.Plates  | Min   | Overall | N.Plates  | Min   | Overall | N.Plates  | Min   | Overall |
| EGF     | 3         | 1.000 | 1.000   | 3         | 0.999 | 0.999   | 3         | 1.000 | 1.000   |
| EOTAXIN | 3         | 0.997 | 0.999   | 3         | 0.987 | 0.995   | 3         | 0.999 | 0.999   |
| FGF     | 3         | 0.998 | 0.999   | 3         | 0.994 | 0.998   | 3         | 0.993 | 0.996   |
| G.CSF   | 3         | 0.996 | 0.998   | 3         | 0.989 | 0.997   | 3         | 0.999 | 0.999   |
| GMCSF   | 3         | 0.999 | 1.000   | 3         | 0.998 | 0.999   | 3         | 0.998 | 0.999   |
| HGF     | 3         | 0.995 | 0.995   | 3         | 0.991 | 0.993   | 3         | 0.972 | 0.979   |
| IFNa    | 3         | 0.999 | 0.999   | 3         | 0.998 | 0.999   | 3         | 0.999 | 0.999   |
| IFNg    | 3         | 0.999 | 1.000   | 3         | 0.998 | 0.999   | 3         | 0.999 | 1.000   |
| IL10    | 3         | 0.999 | 0.999   | 3         | 0.995 | 0.998   | 3         | 1.000 | 1.000   |
| IL12    | 3         | 0.995 | 0.996   | 3         | 0.996 | 0.997   | 3         | 0.993 | 0.992   |
| IL13    | 3         | 0.999 | 1.000   | 3         | 0.996 | 0.999   | 3         | 0.999 | 0.999   |
| IL15    | 3         | 0.999 | 0.999   | 3         | 0.994 | 0.998   | 3         | 0.997 | 0.997   |
| IL17    | 3         | 0.999 | 0.999   | 3         | 0.997 | 0.999   | 3         | 0.999 | 0.999   |
| IL1B    | 3         | 0.996 | 0.999   | 3         | 0.998 | 0.999   | 3         | 0.995 | 0.996   |
| IL1RA   | 3         | 0.997 | 0.997   | 3         | 0.993 | 0.997   | 3         | 0.992 | 0.993   |
| IL2     | 3         | 0.999 | 0.999   | 3         | 0.998 | 0.999   | 3         | 0.999 | 0.999   |
| IL2R    | 3         | 1.000 | 1.000   | 3         | 0.999 | 0.999   | 3         | 0.997 | 0.998   |
| IL4     | 3         | 0.999 | 0.999   | 3         | 0.998 | 0.999   | 3         | 0.998 | 0.998   |
| IL5     | 3         | 0.999 | 0.999   | 3         | 0.998 | 0.999   | 3         | 0.999 | 1.000   |
| IL6     | 3         | 0.999 | 0.999   | 3         | 0.997 | 0.999   | 3         | 0.999 | 0.999   |
| IL7     | 3         | 0.988 | 0.993   | 3         | 0.994 | 0.998   | 3         | 0.992 | 0.993   |
| IL8     | 3         | 0.998 | 0.998   | 3         | 0.995 | 0.997   | 3         | 0.998 | 0.997   |
| IP10    | 3         | 0.999 | 1.000   | 3         | 0.997 | 0.999   | 3         | 0.999 | 1.000   |
| MCP1    | 3         | 0.997 | 0.999   | 3         | 0.991 | 0.996   | 3         | 0.998 | 0.999   |
| MIG     | 3         | 0.994 | 0.997   | 3         | 0.995 | 0.996   | 3         | 0.989 | 0.993   |
| MIP1A   | 3         | 0.999 | 0.999   | 3         | 0.992 | 0.998   | 3         | 0.999 | 0.999   |
| MIP1B   | 3         | 1.000 | 1.000   | 3         | 0.997 | 0.998   | 3         | 0.998 | 0.998   |
| RANTES  | 3         | 0.999 | 0.999   | 3         | 0.988 | 0.996   | 3         | 0.996 | 0.997   |
| TNFa    | 3         | 0.999 | 0.999   | 3         | 0.997 | 0.999   | 3         | 0.997 | 0.997   |
| VEGF    | 3         | 0.998 | 0.999   | 3         | 0.987 | 0.997   | 3         | 0.995 | 0.996   |

## 7 Assay random and systematic variability

### 7.1 Mean concentration for controls by plate and analyte

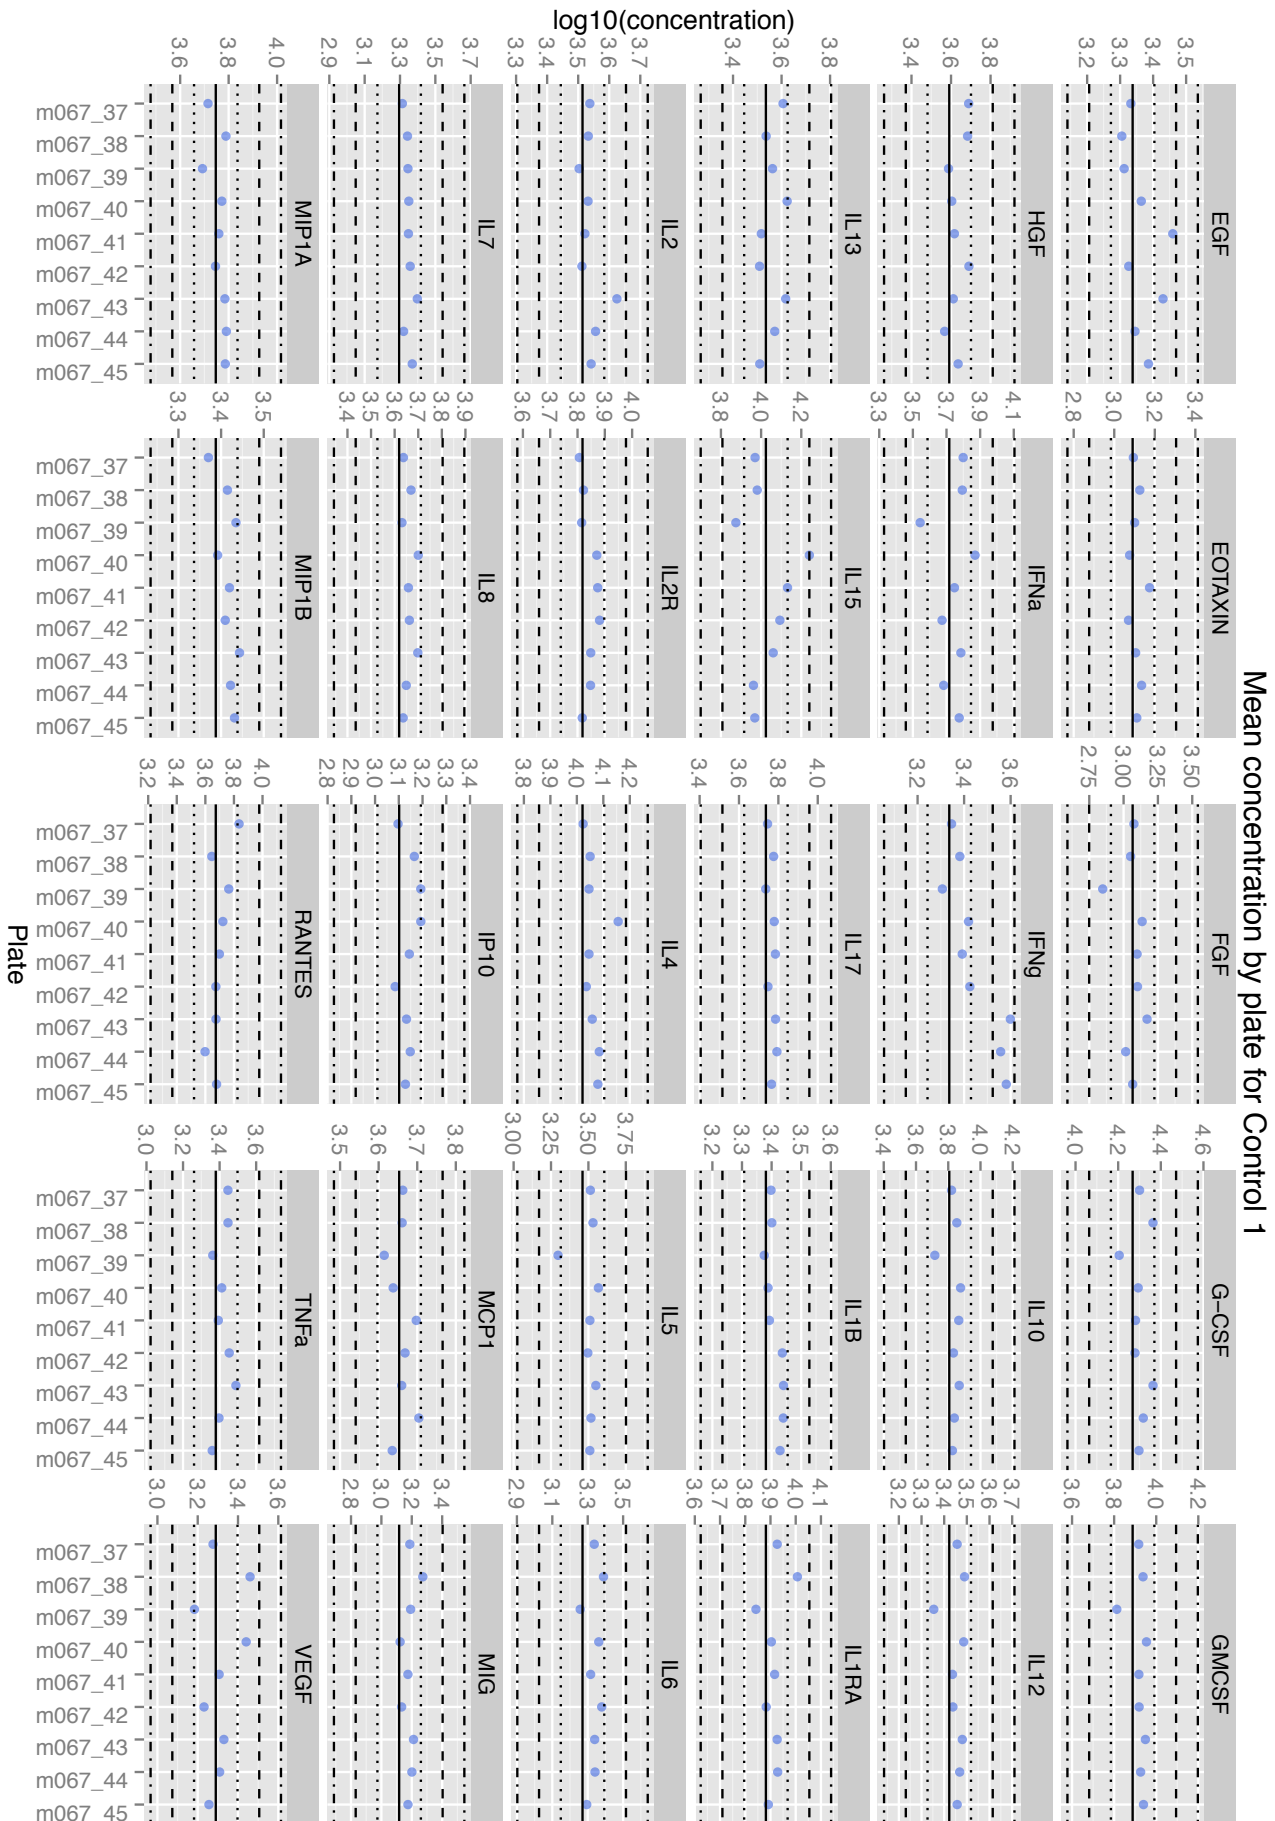

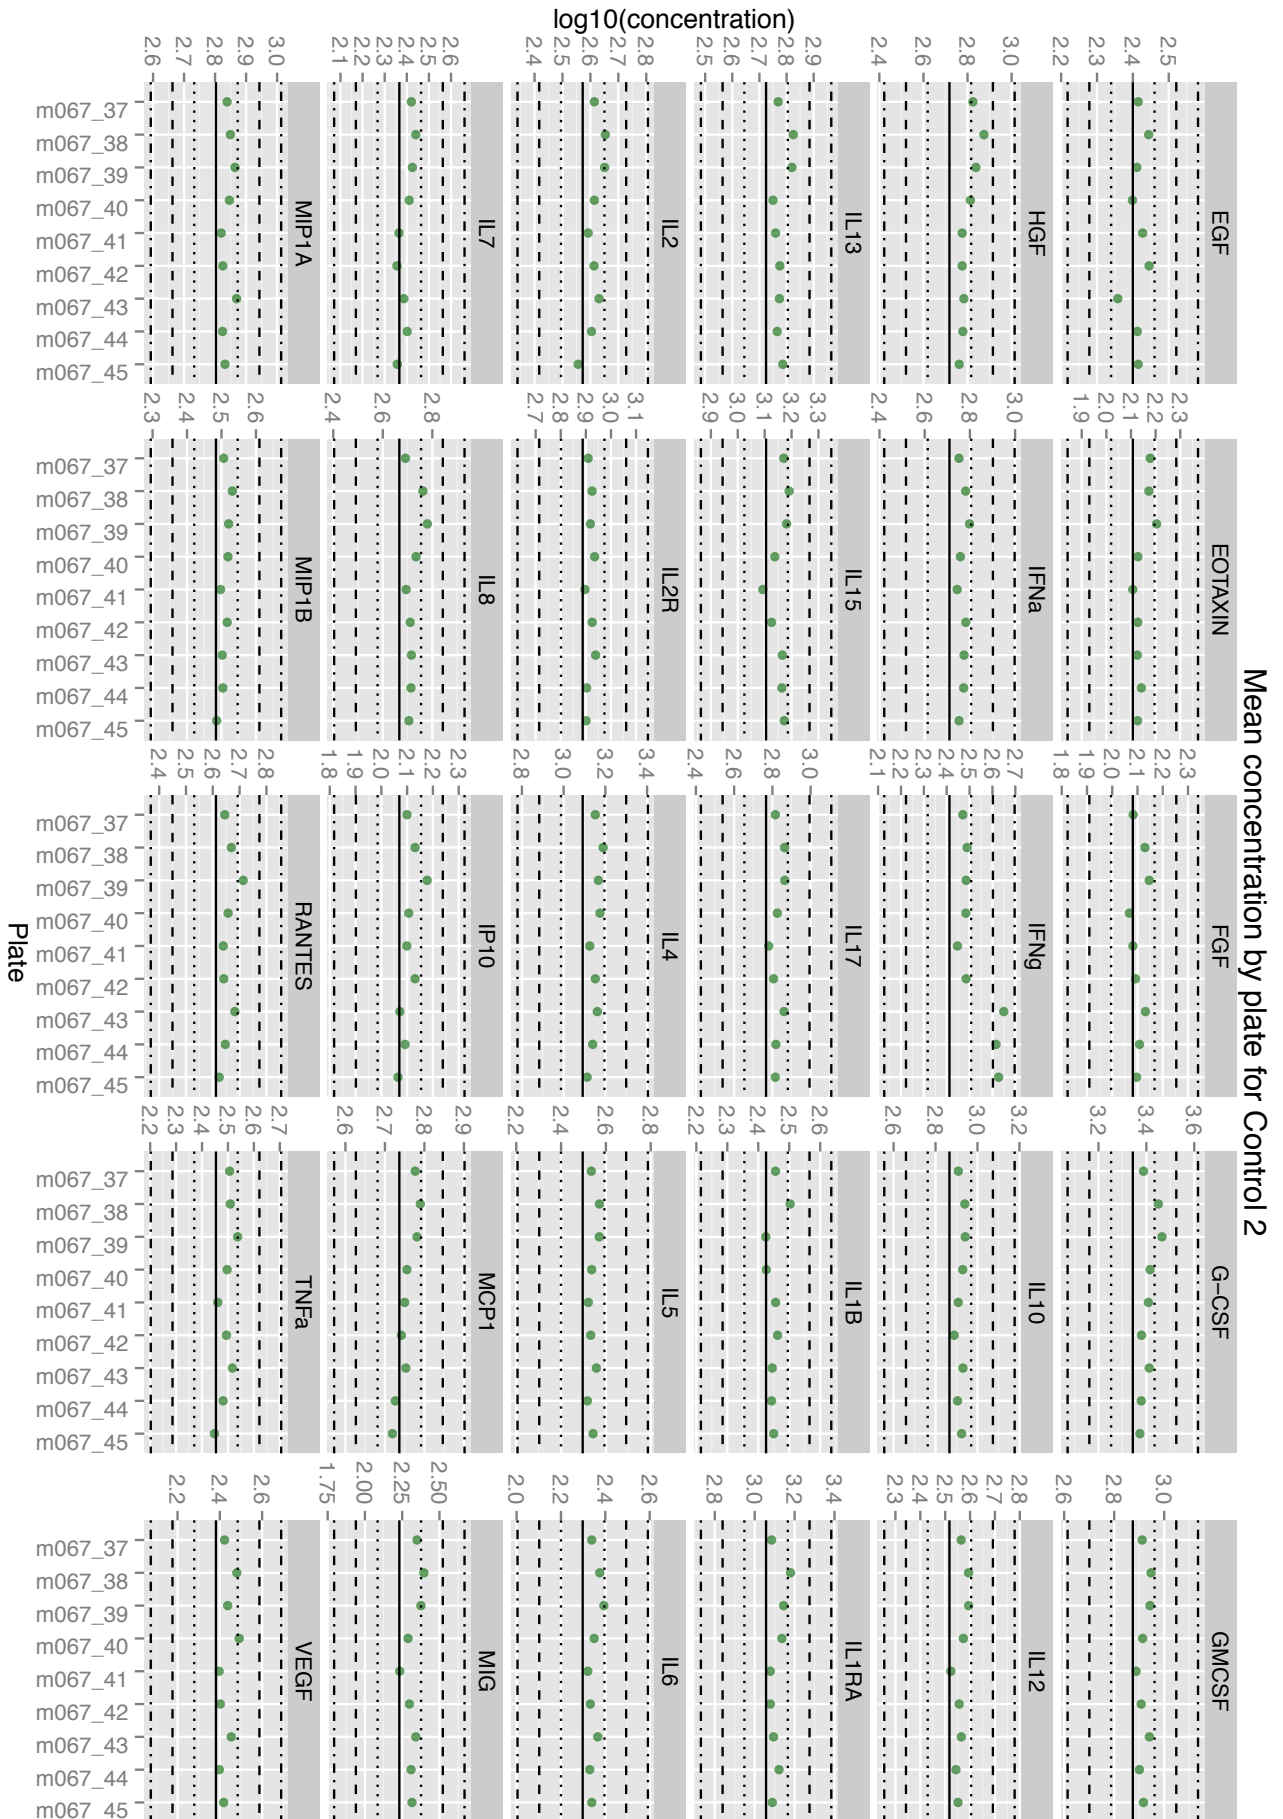

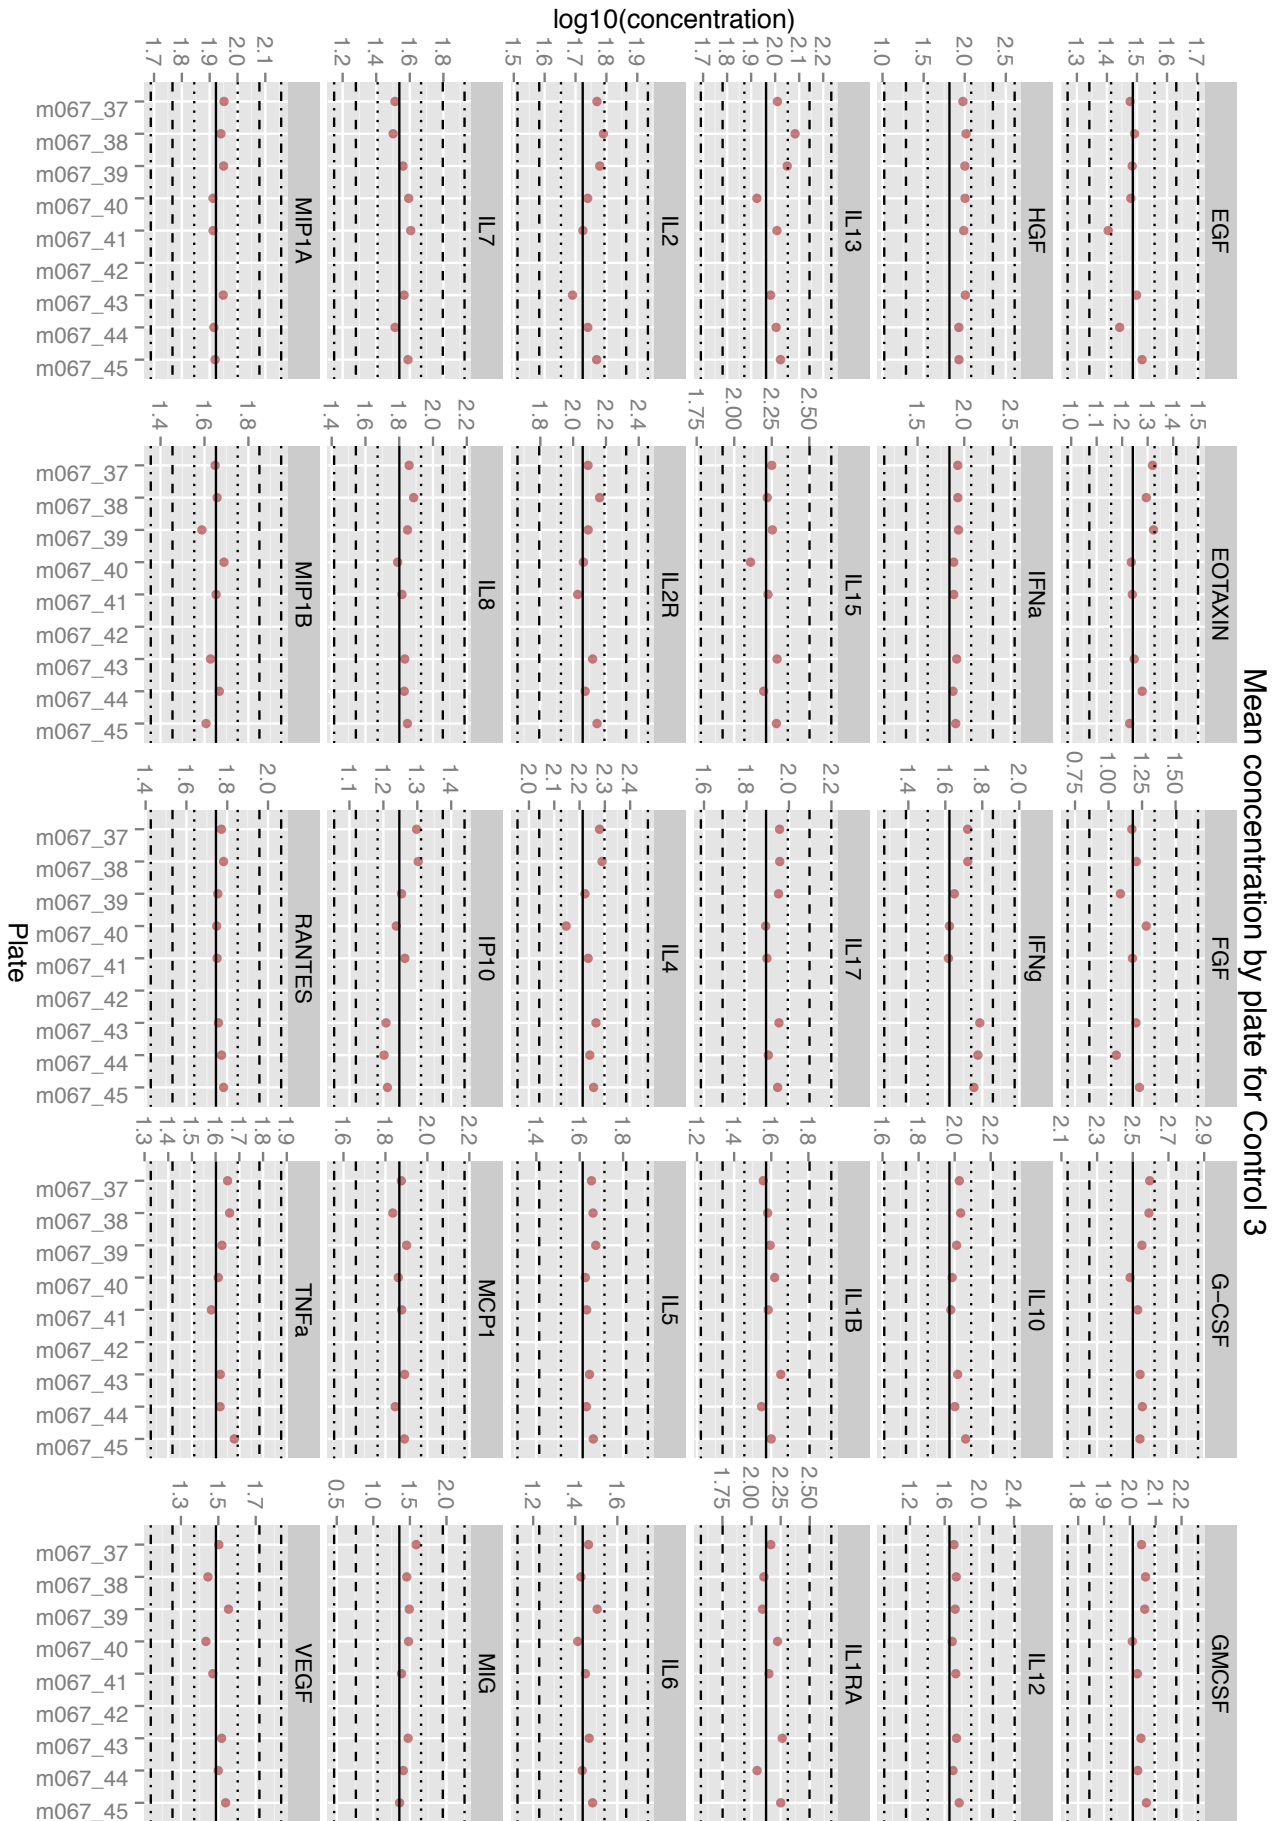

## 7.2 Coefficient of variation by day

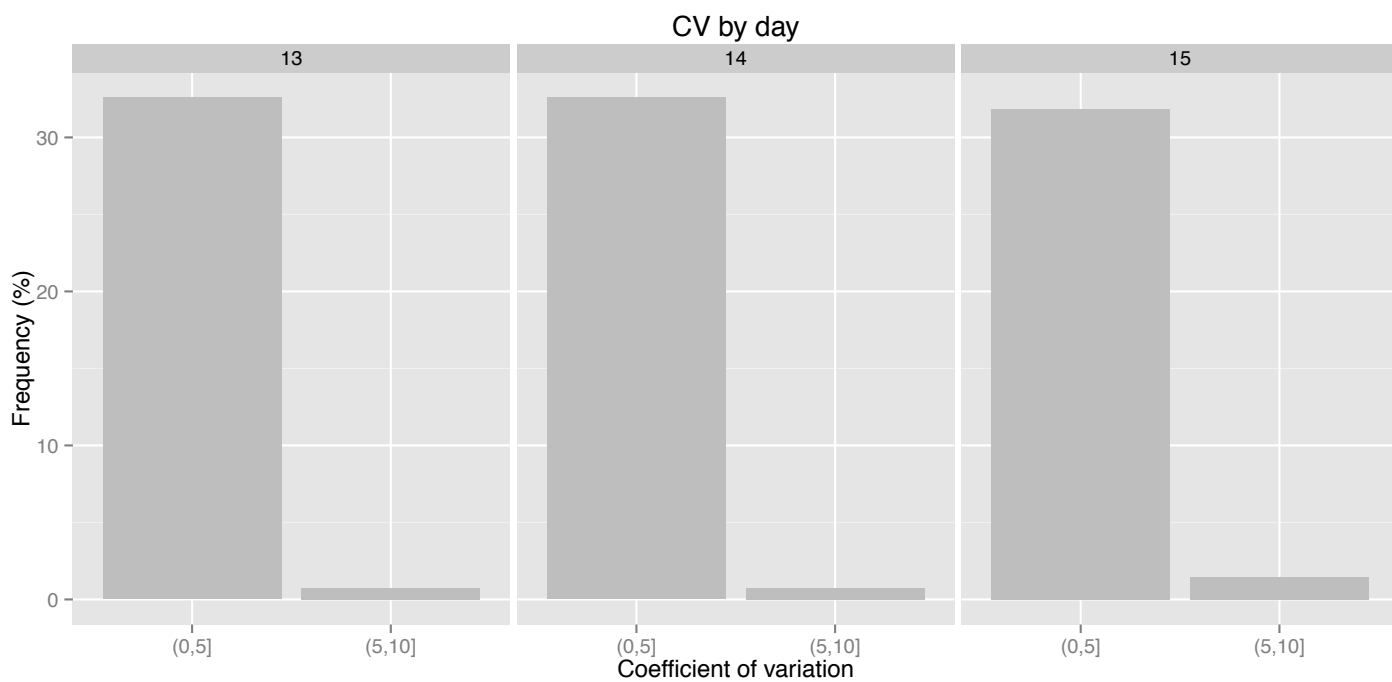

| Day | CV categories |        |         |         |         |          |
|-----|---------------|--------|---------|---------|---------|----------|
|     | (0,5]         | (5,10] | (10,15] | (15,20] | (20,30] | (30,Inf] |
| 13  | 88            | 2      | 0       | 0       | 0       | 0        |
| 14  | 88            | 2      | 0       | 0       | 0       | 0        |
| 15  | 86            | 4      | 0       | 0       | 0       | 0        |

### 7.5 Agreement for positive controls

Agreement by analyte and batch for Control 1

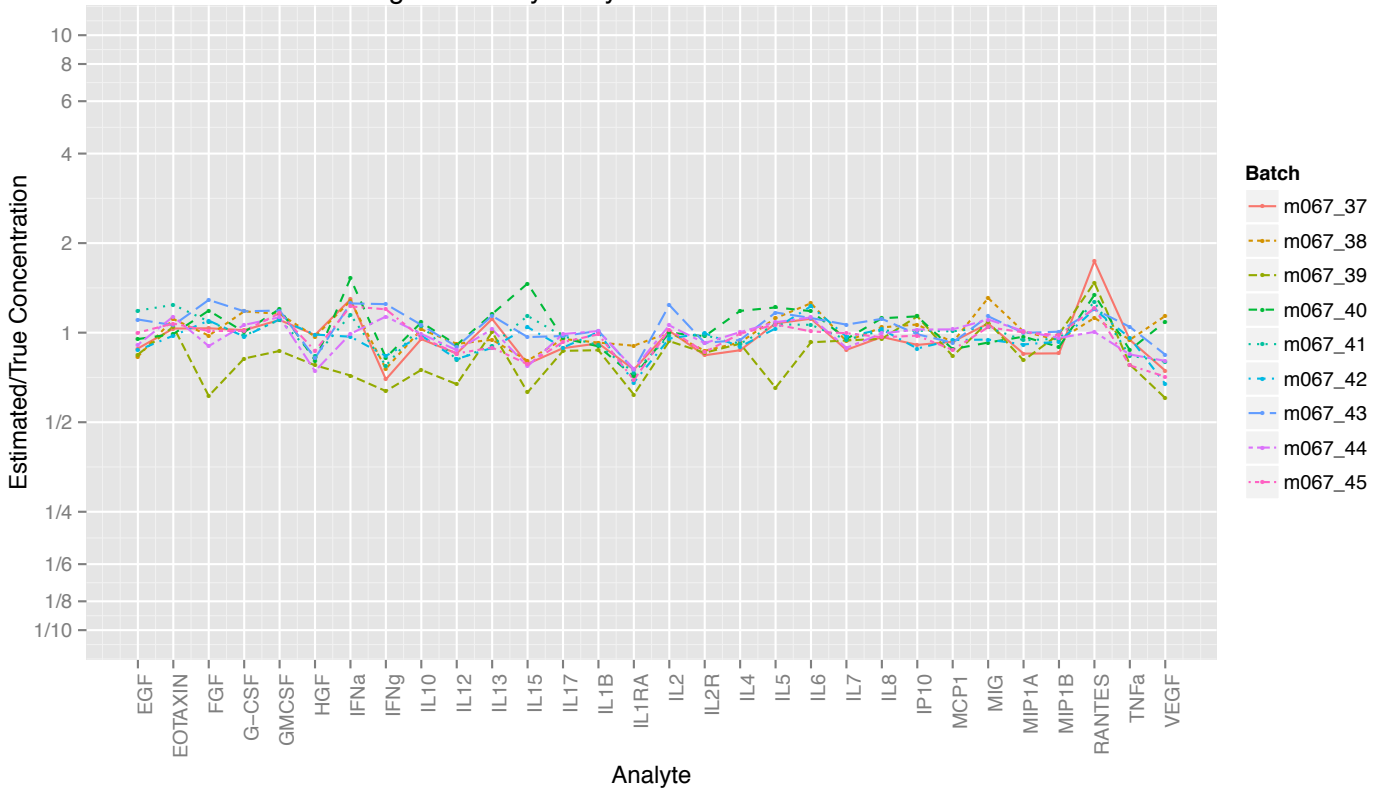

Agreement by analyte and batch for Control 2

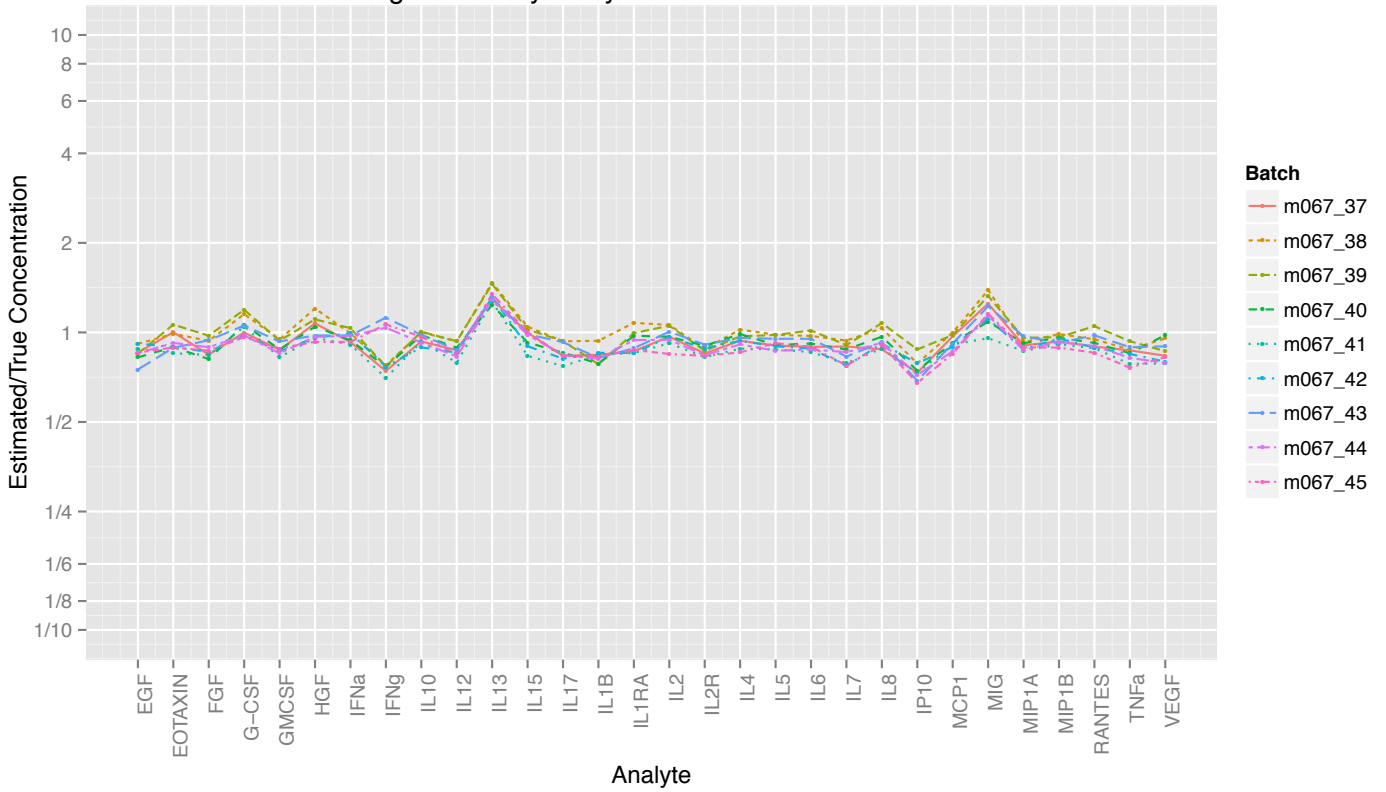

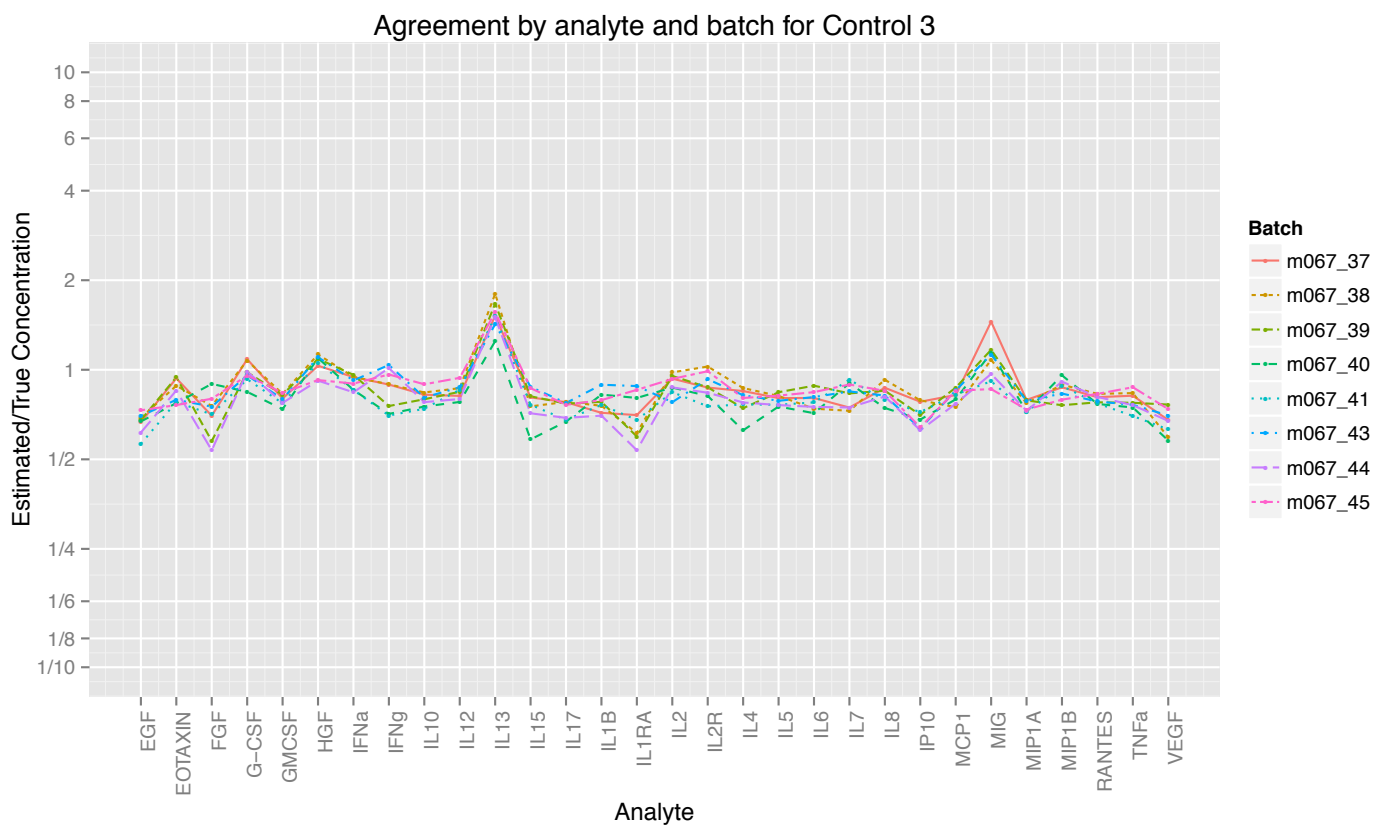

## 8.6 Standard curve and Residuals plots by analyte and stimulation

Standard curve plot information:

- Orange point: positive control.
- Black filled point: standard curve value.
- Green line: background.
- Non-filled black point: values from standard samples not included in the estimation of the curve (flagged).

Residuals plot information:

- Black line: 0 value reference.
- Dashed line:  $\pm 2.5$  value (outlier limit).
- Black filled point: standardized residual value of the fitted point.





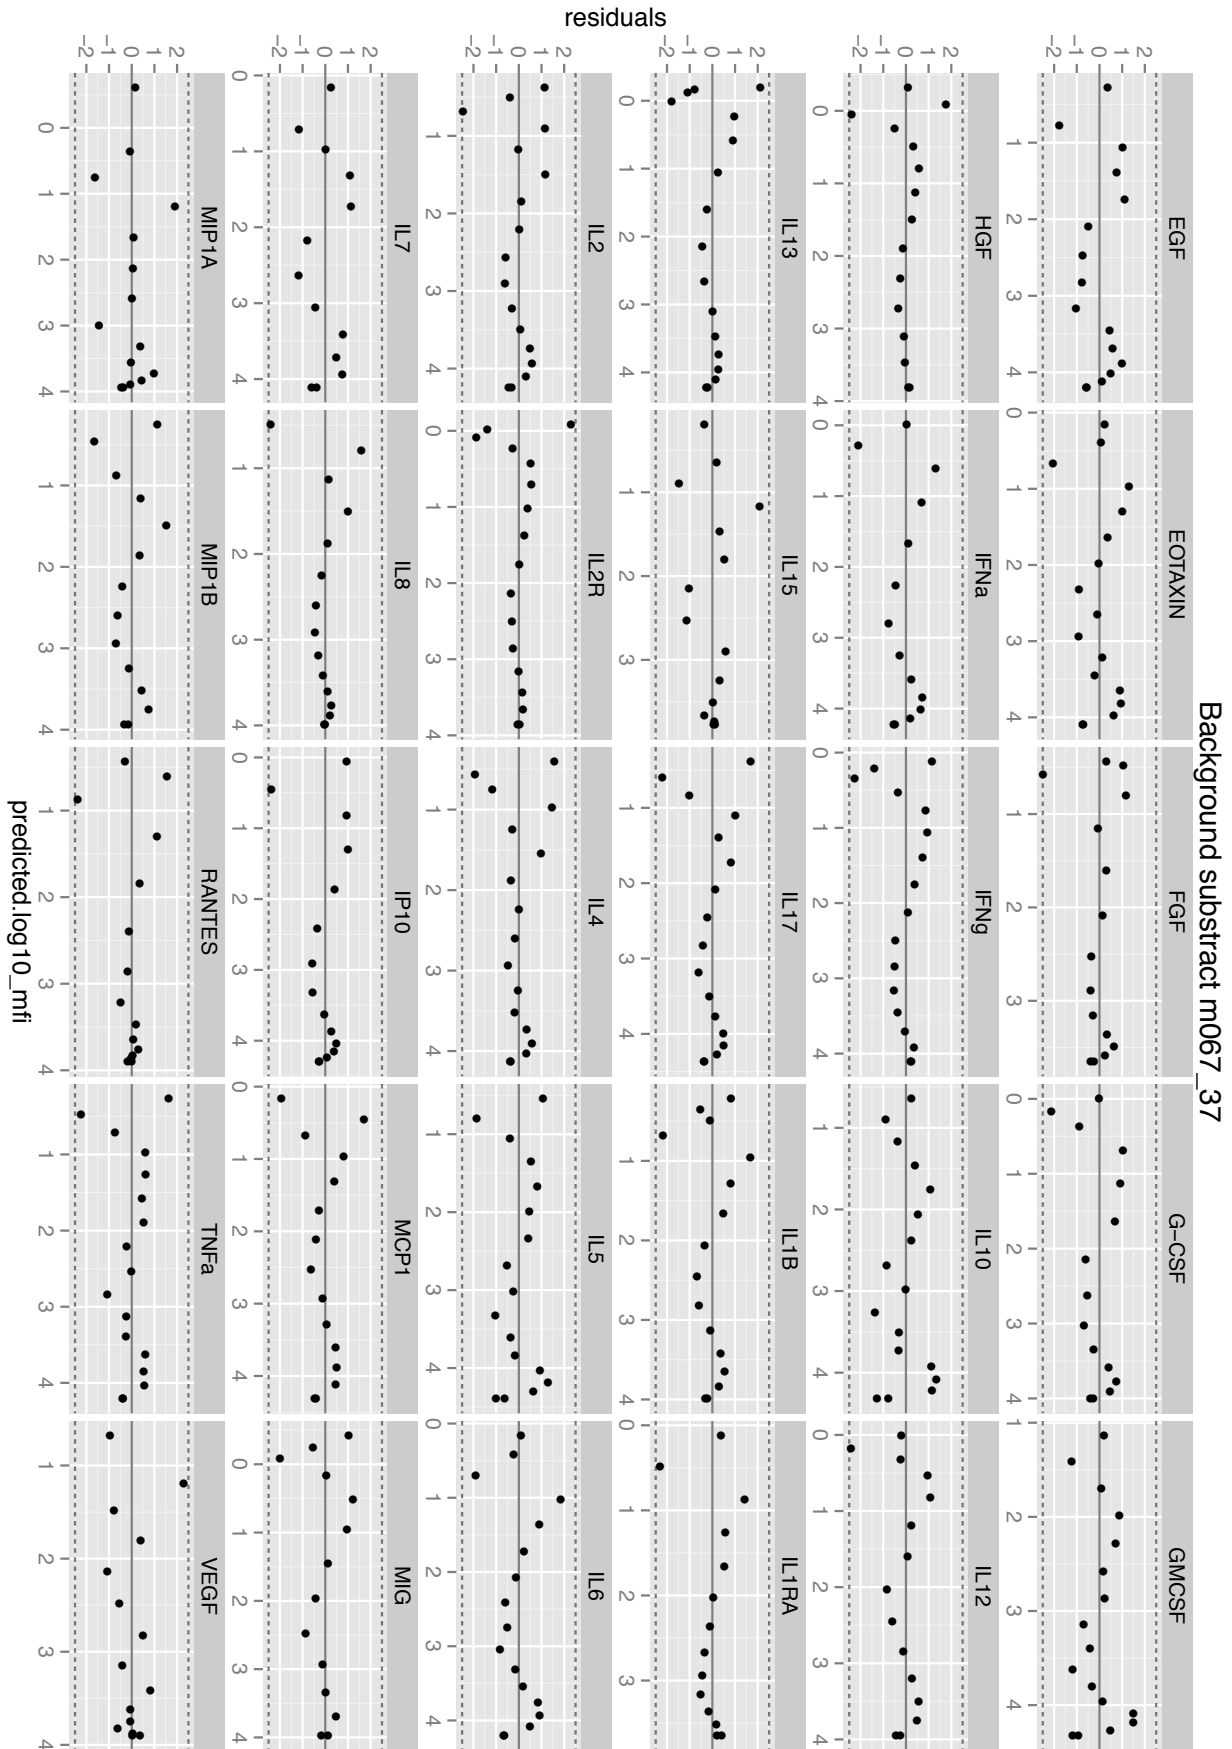

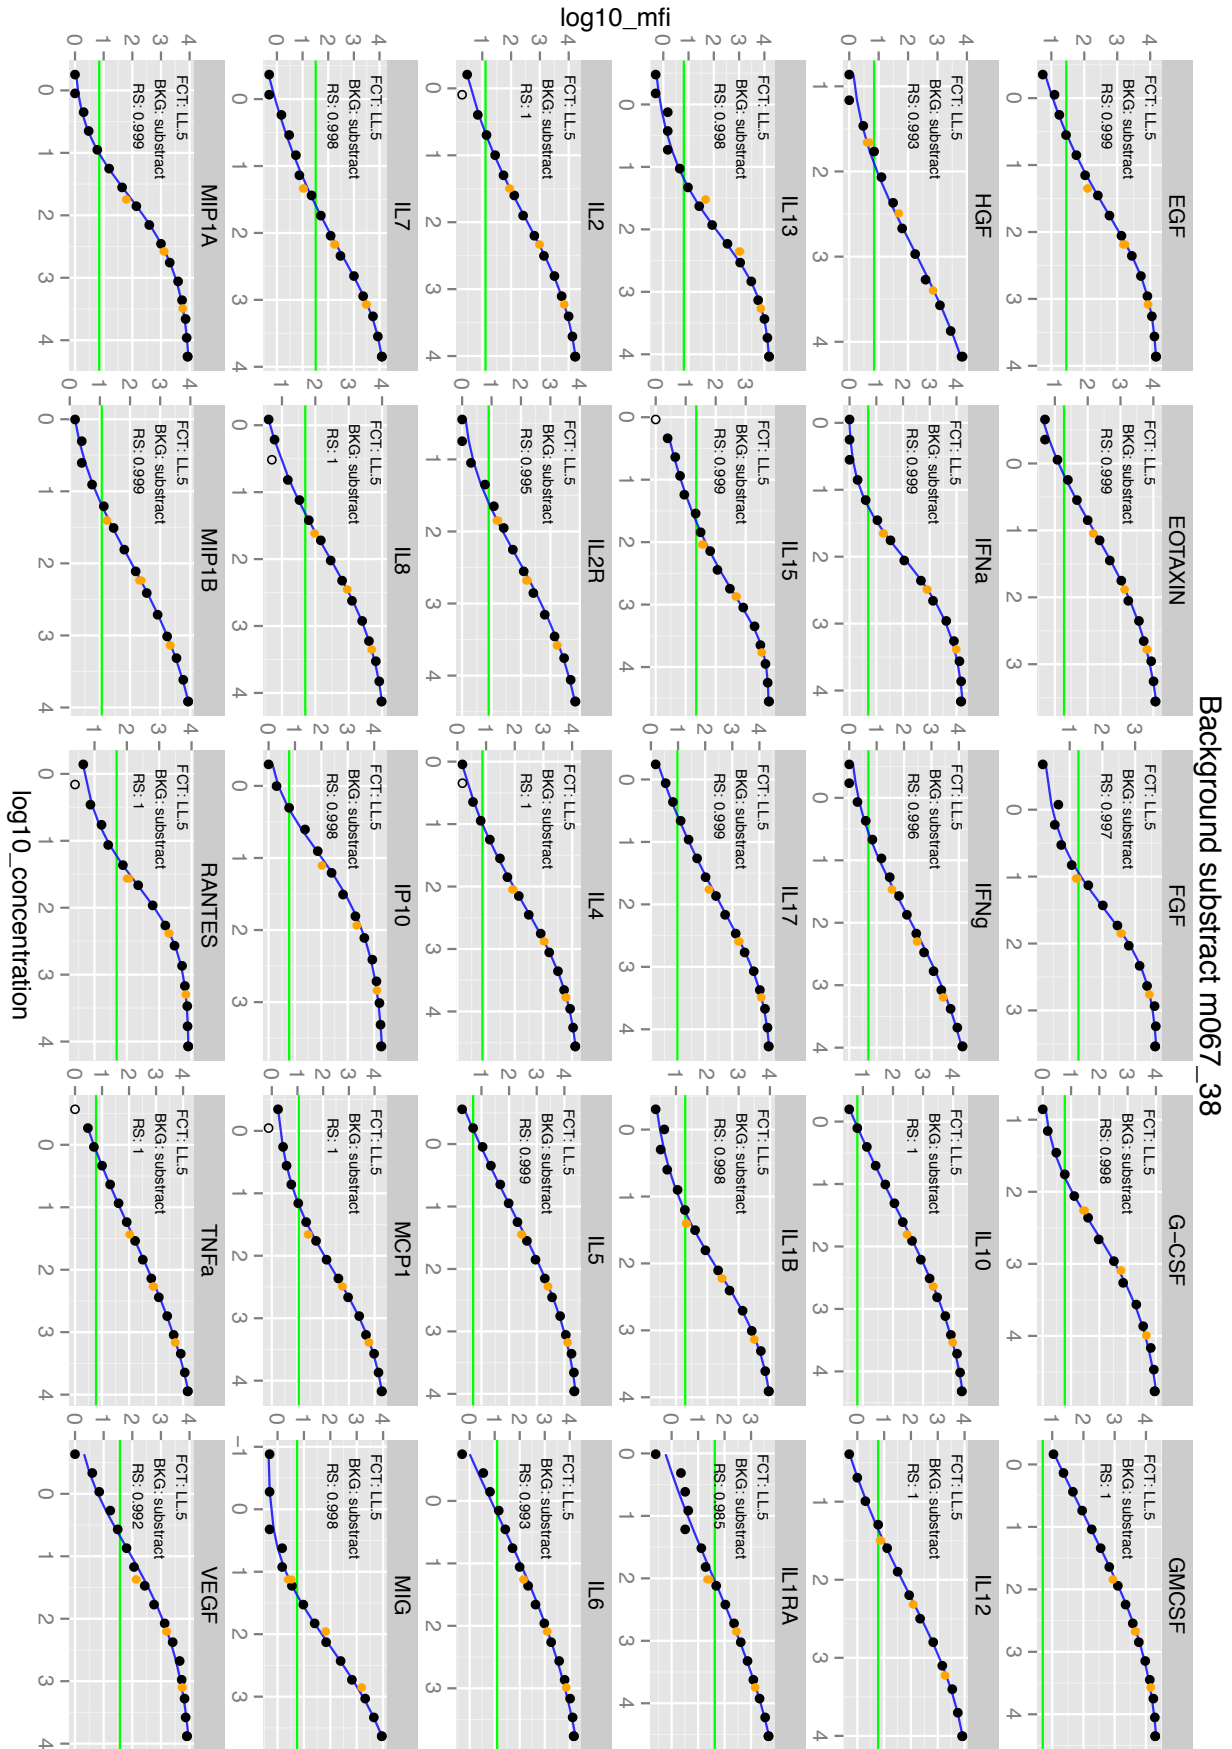

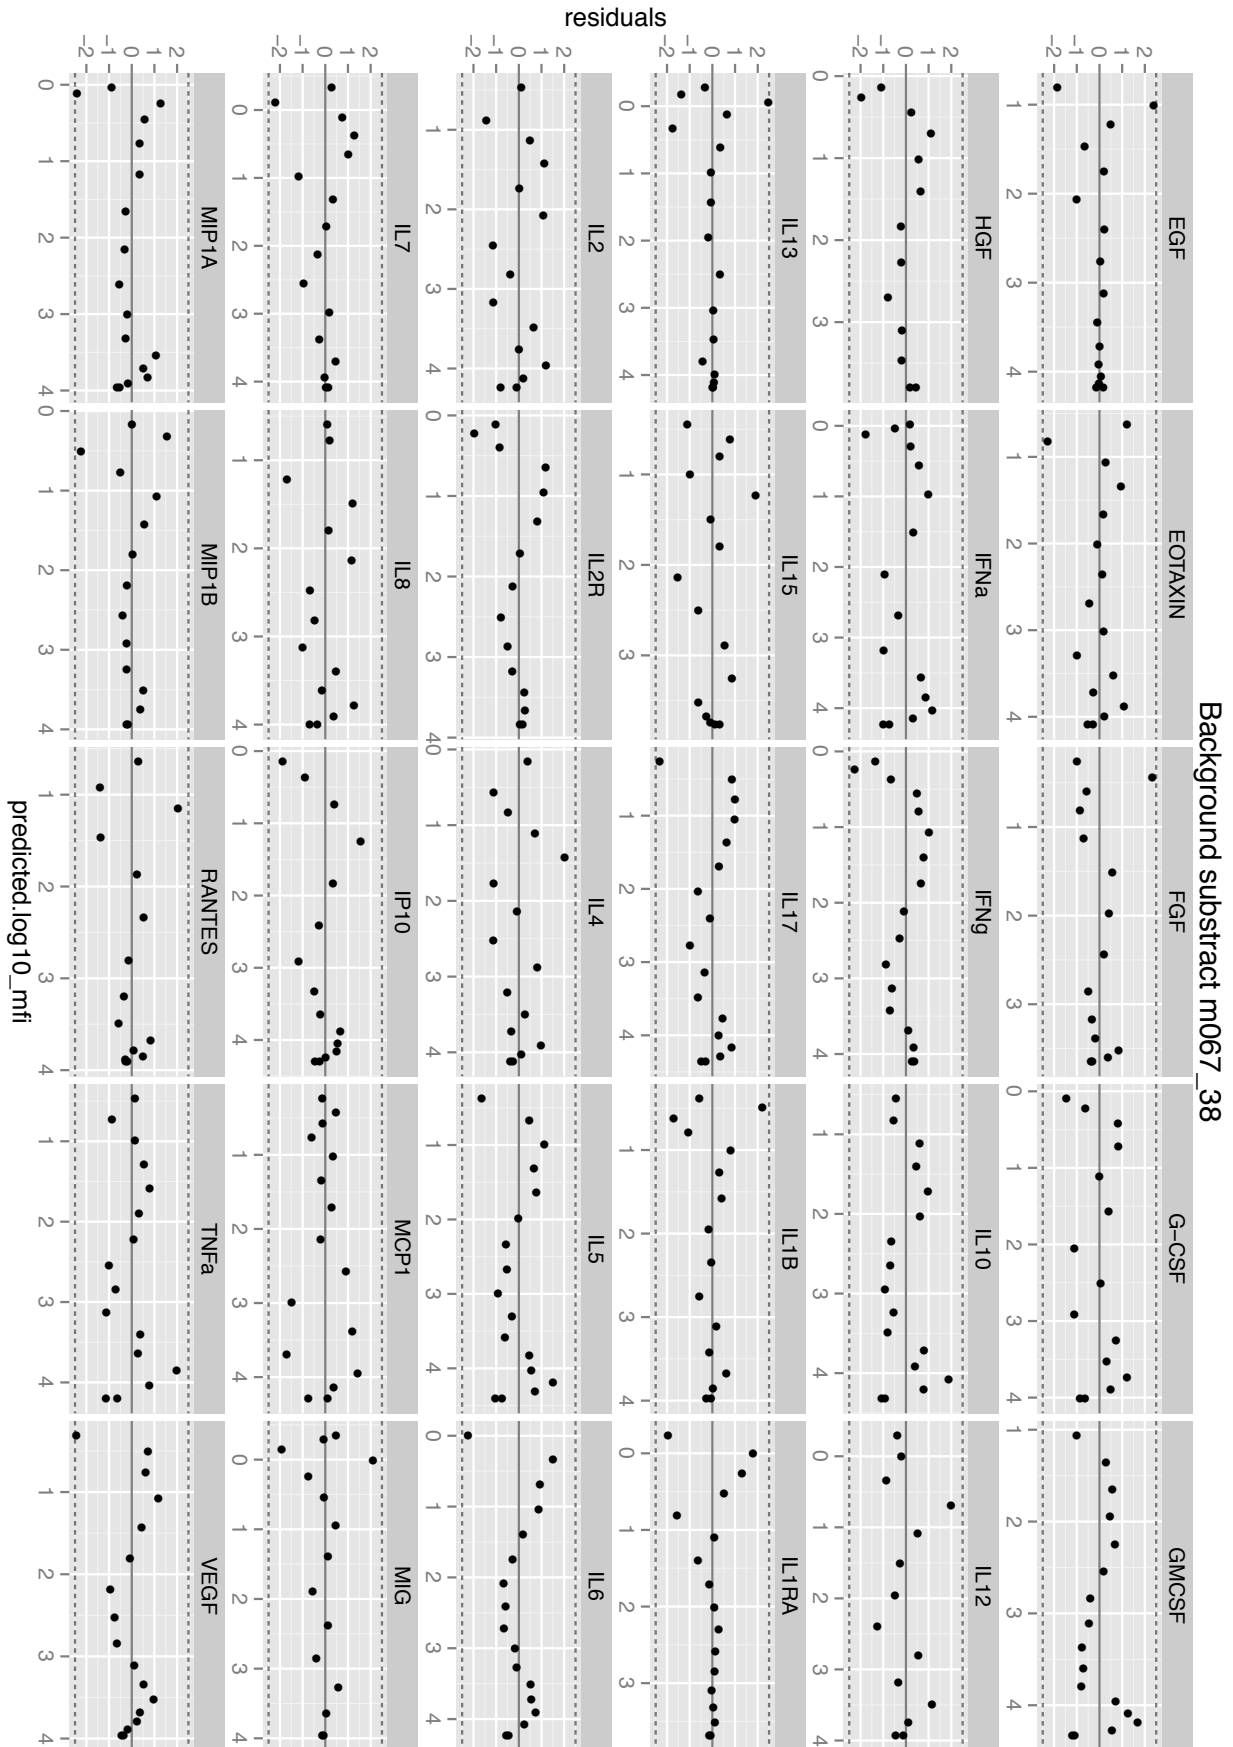

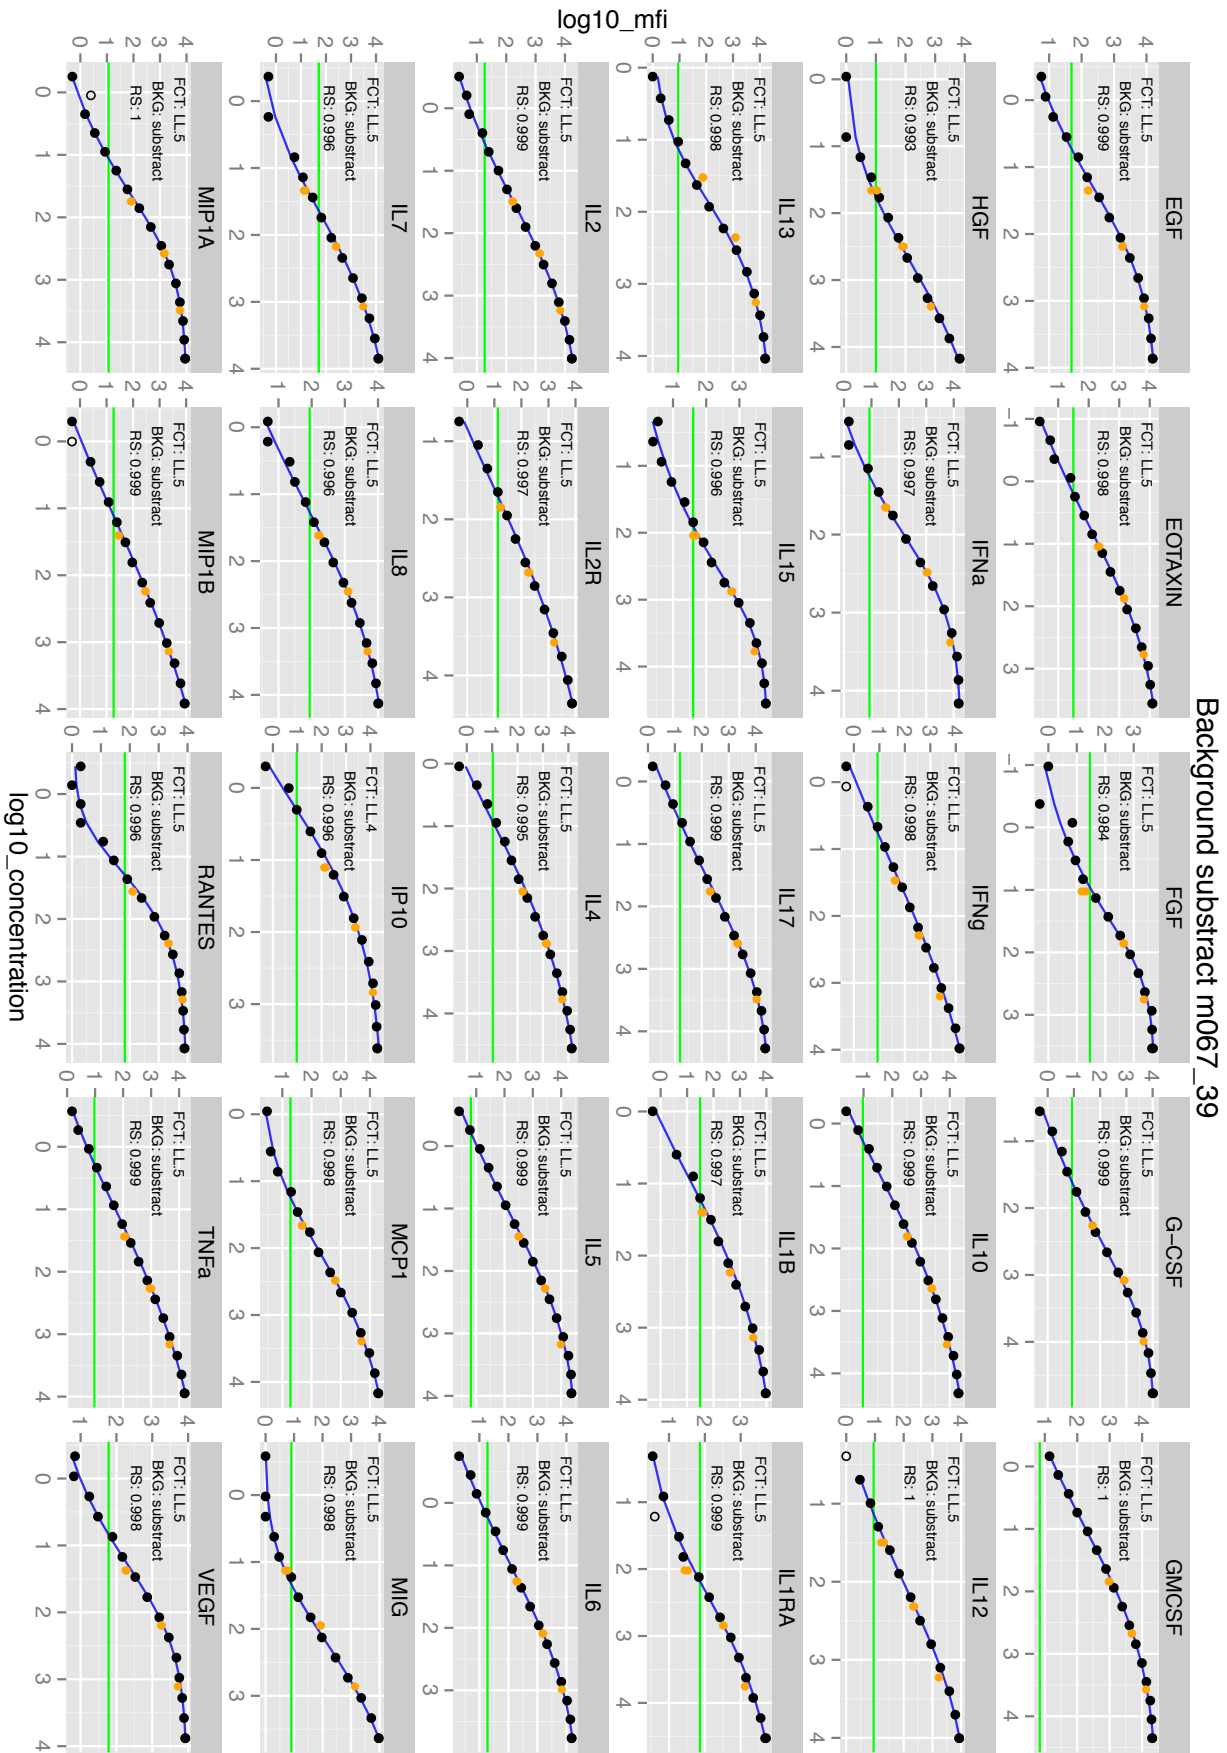

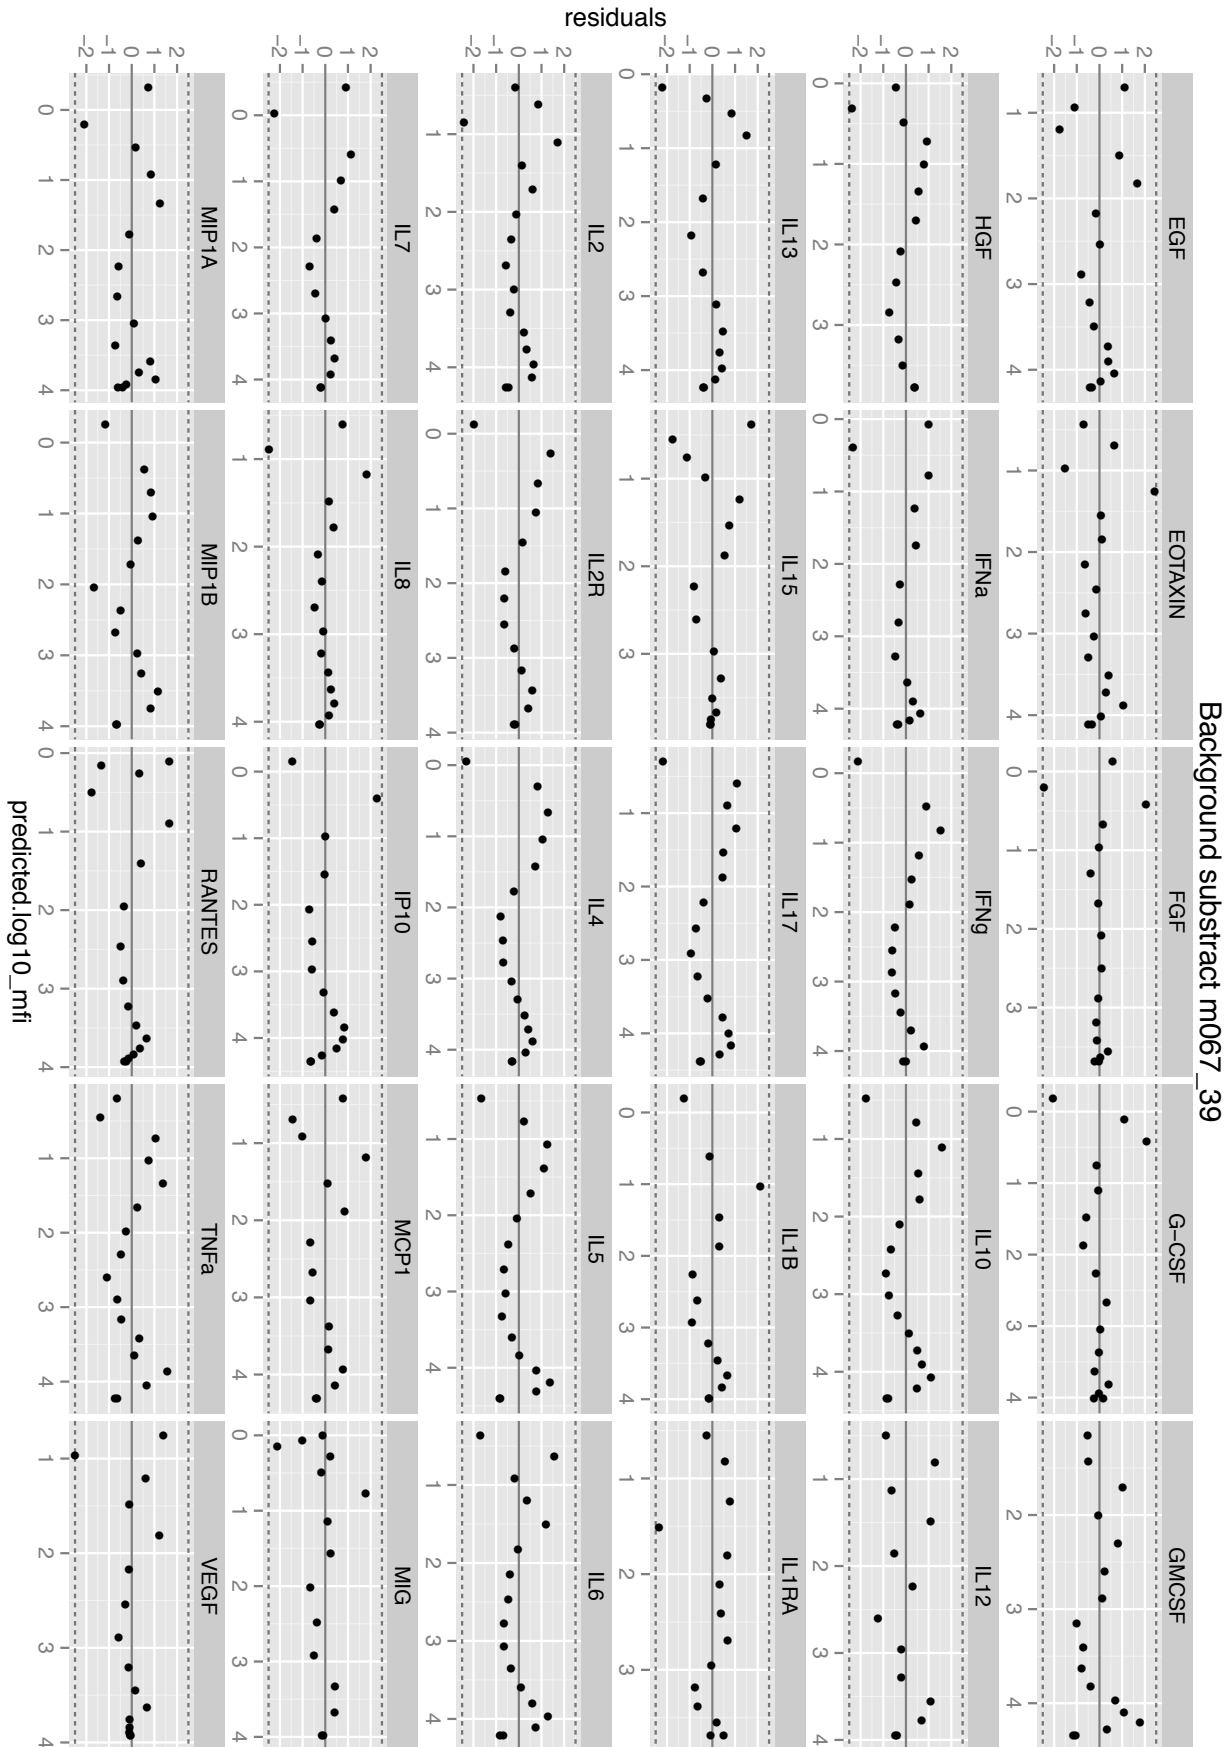

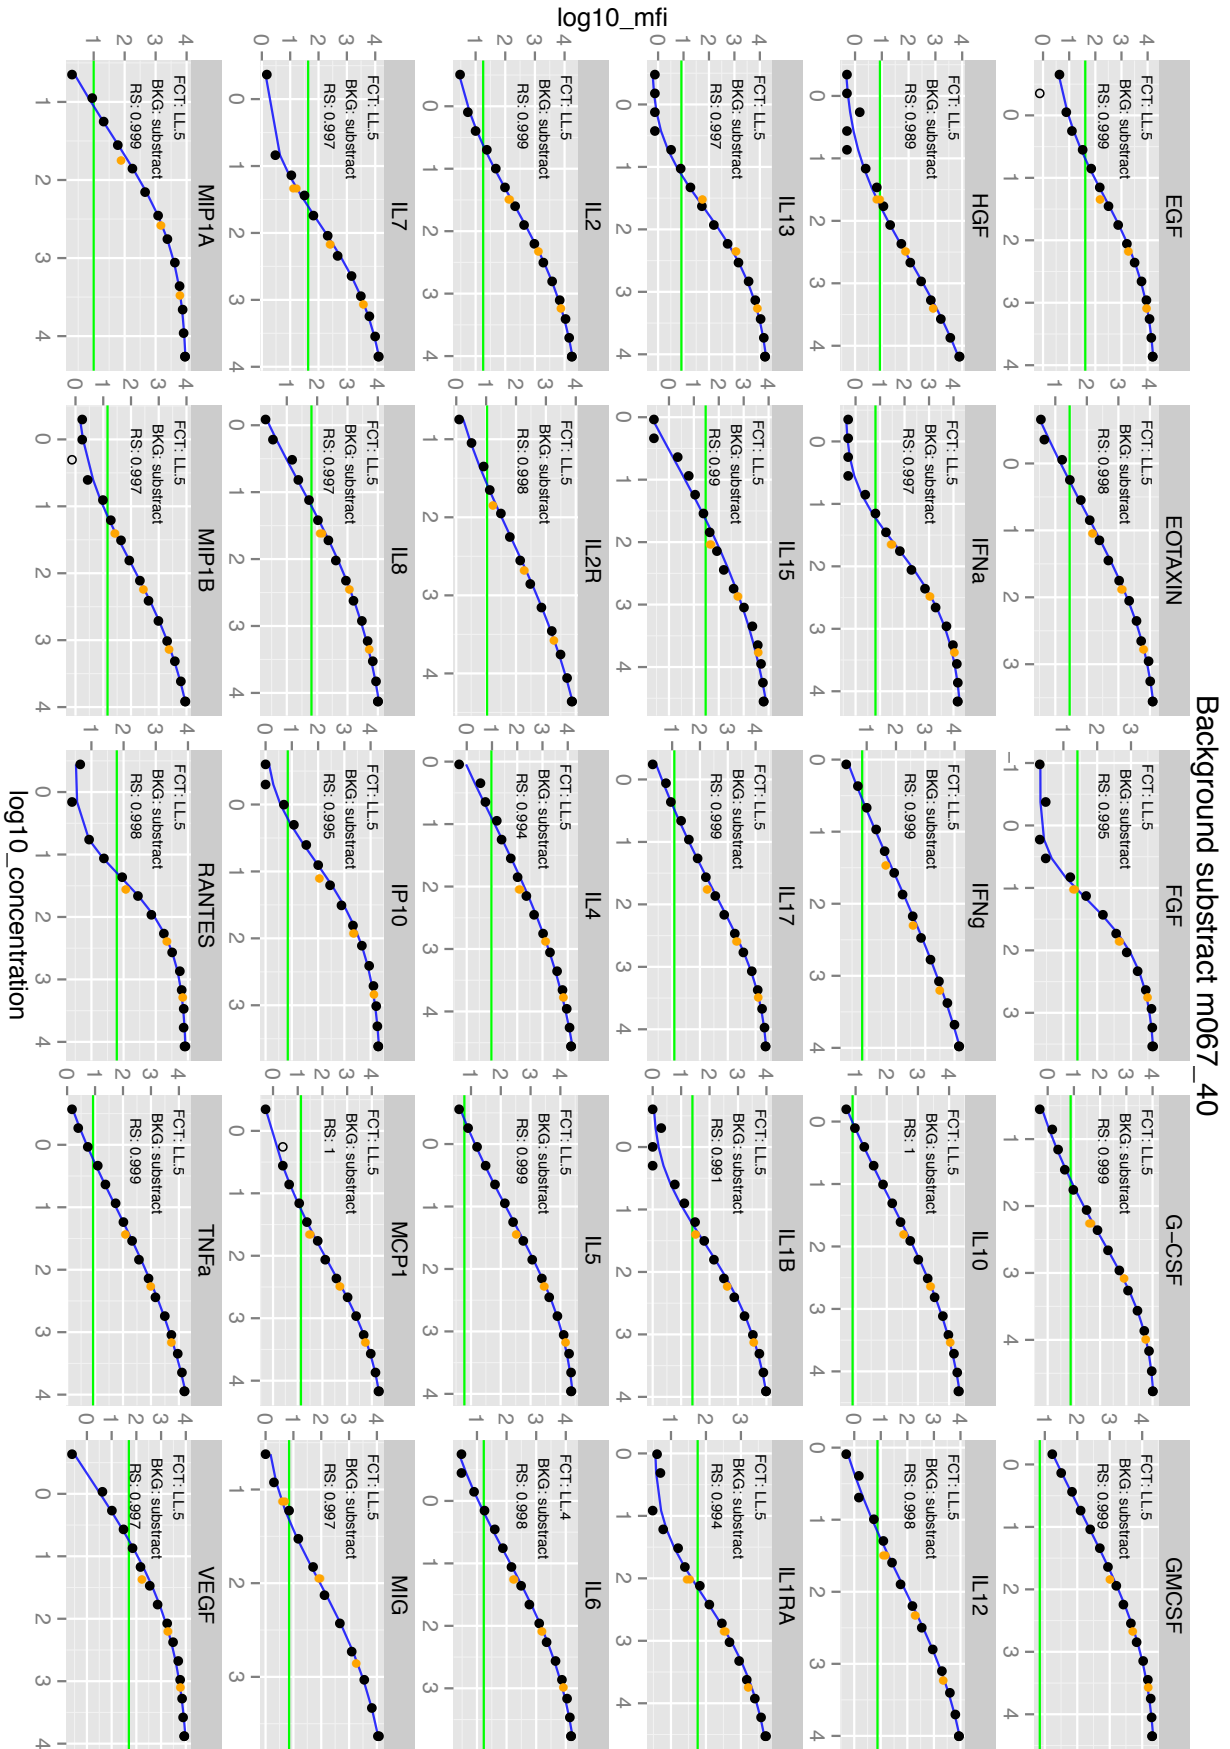

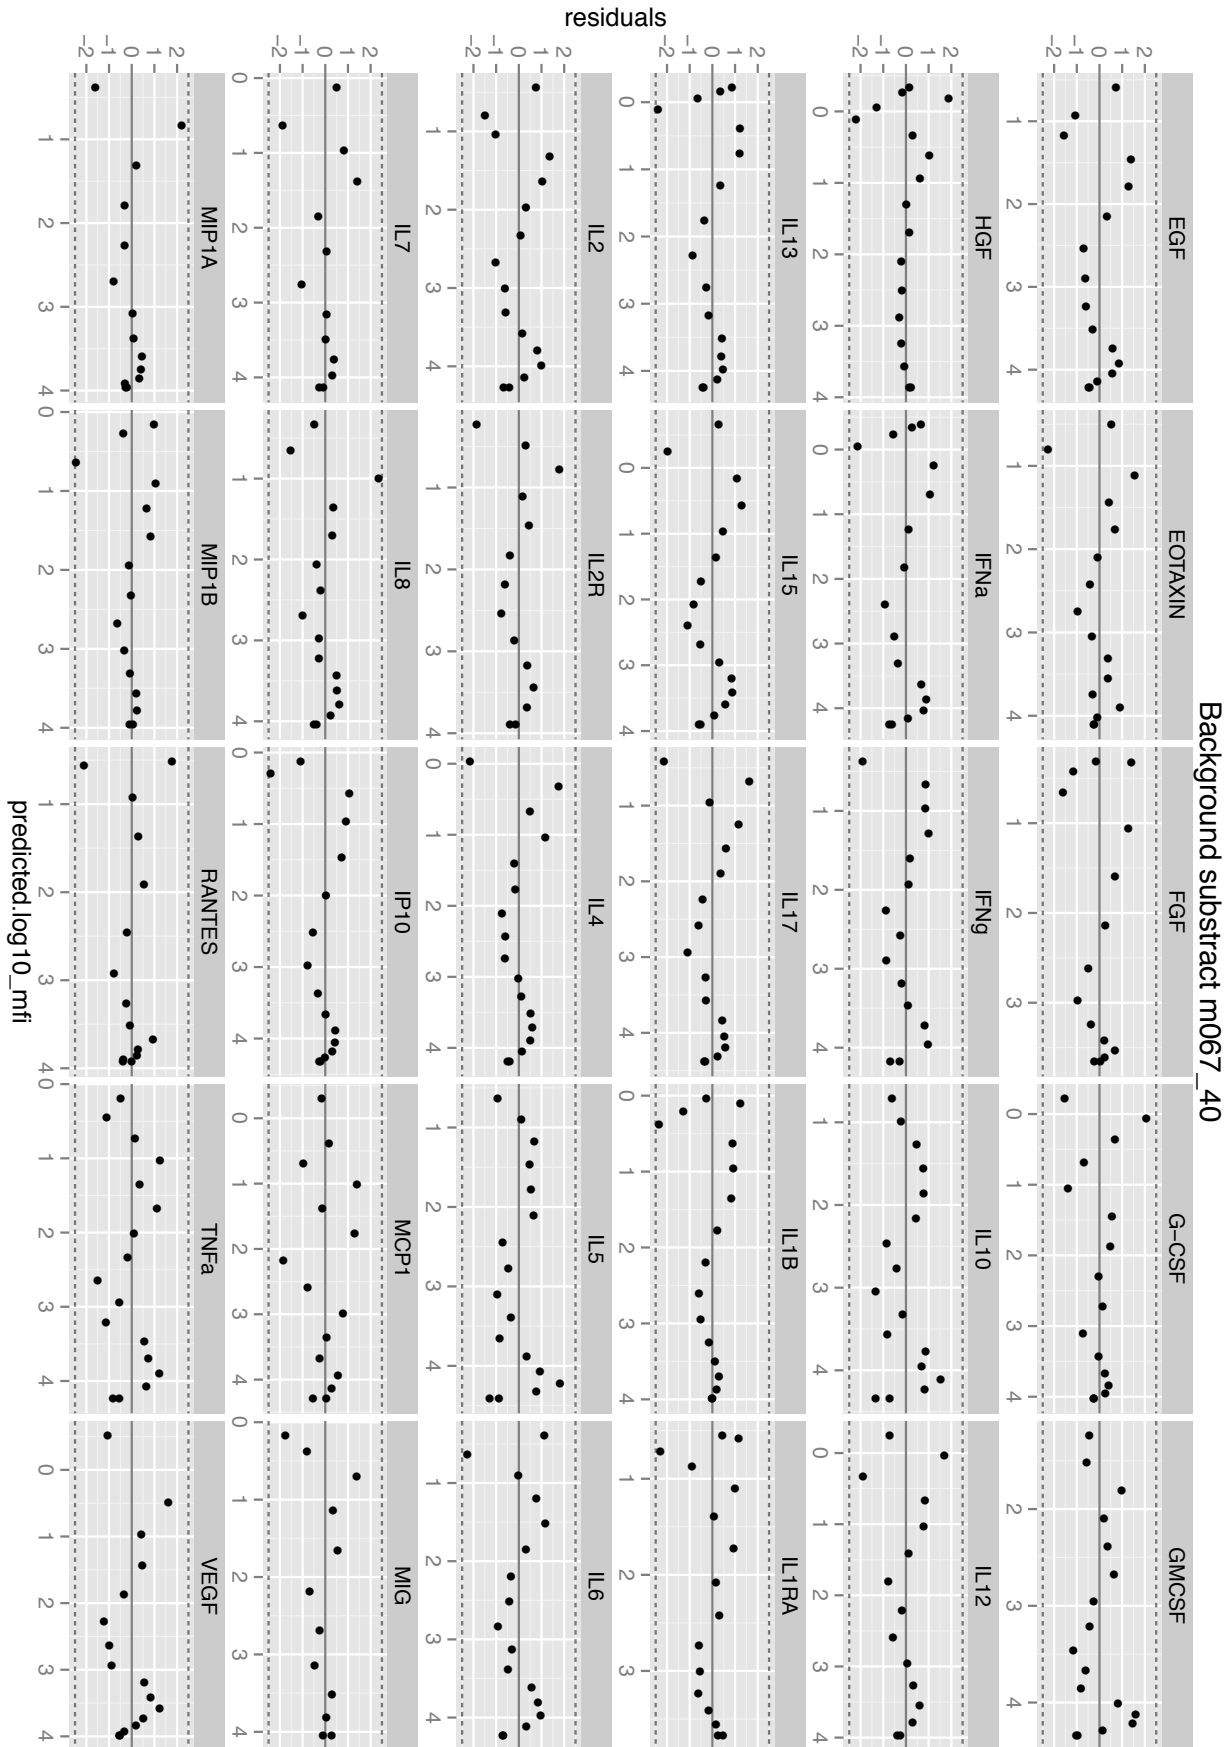



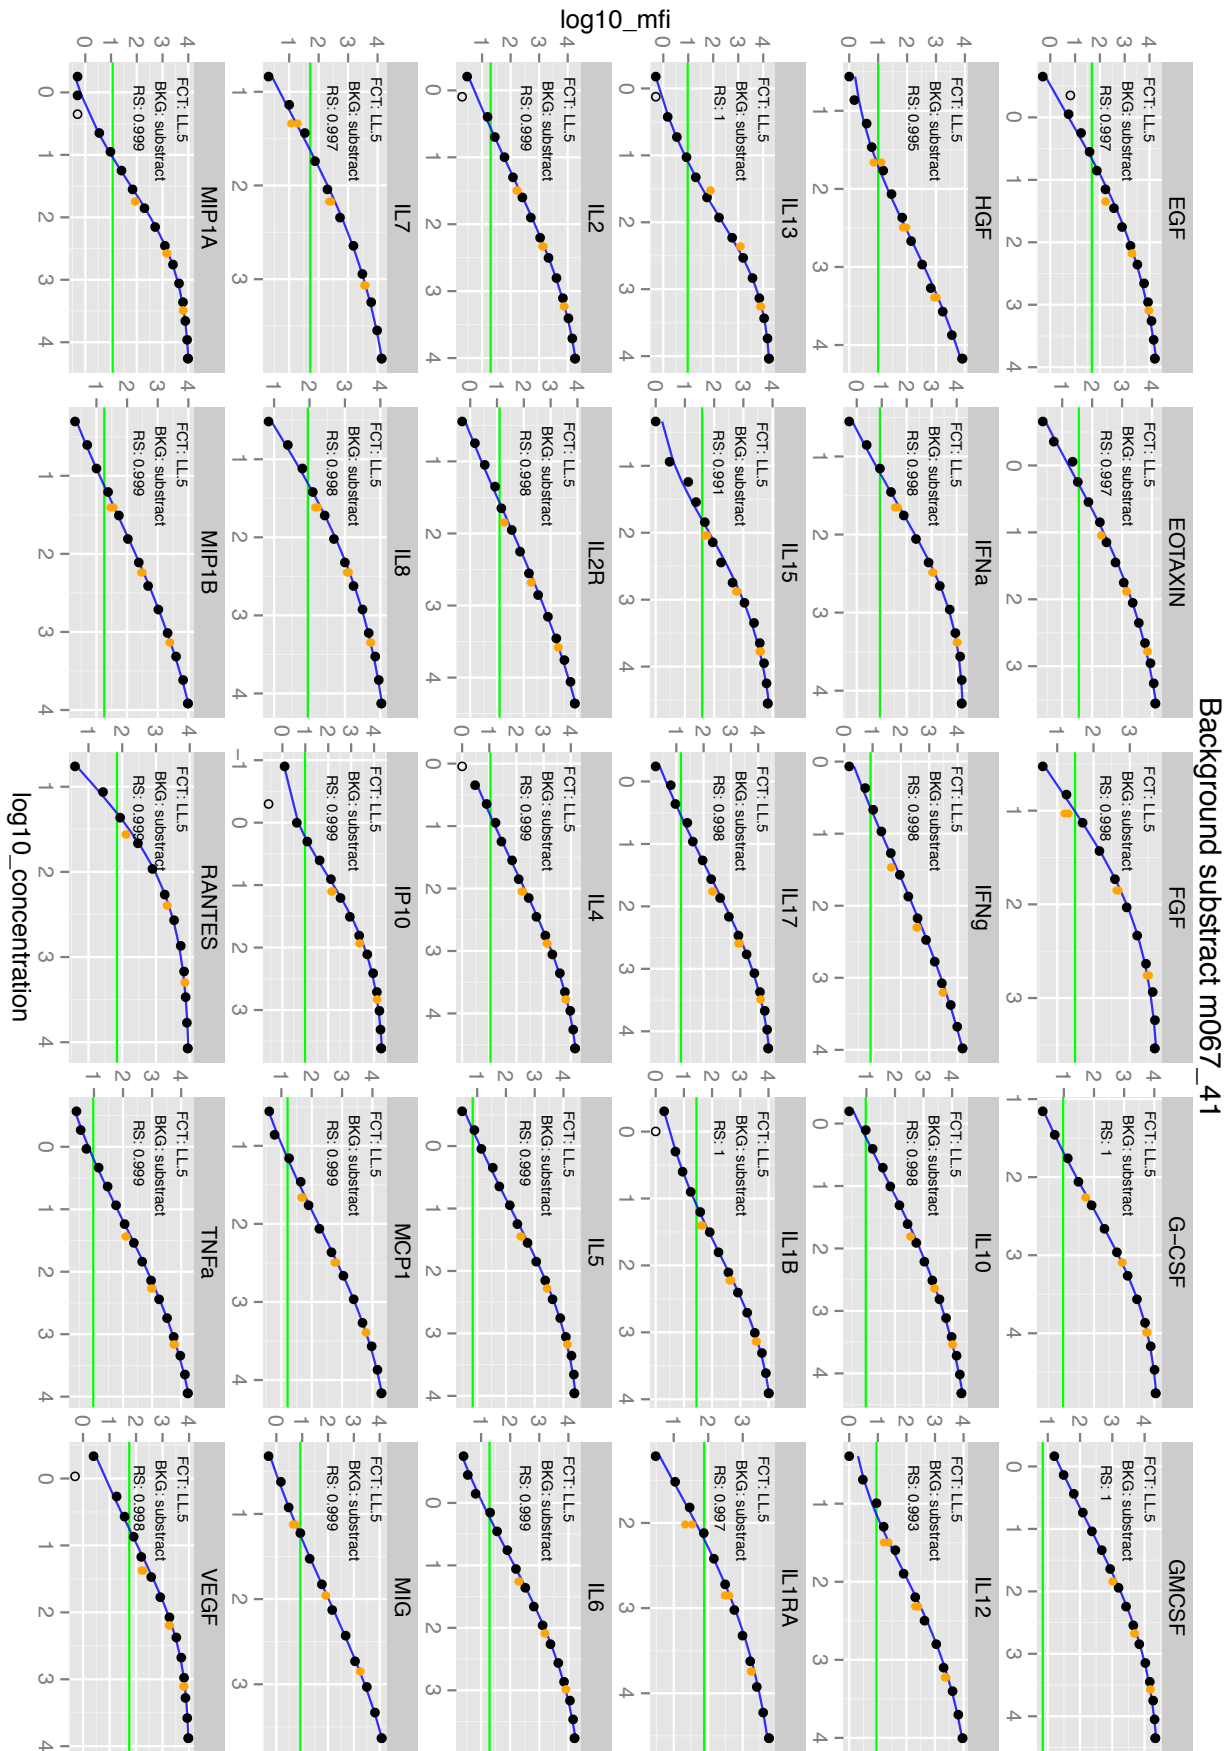

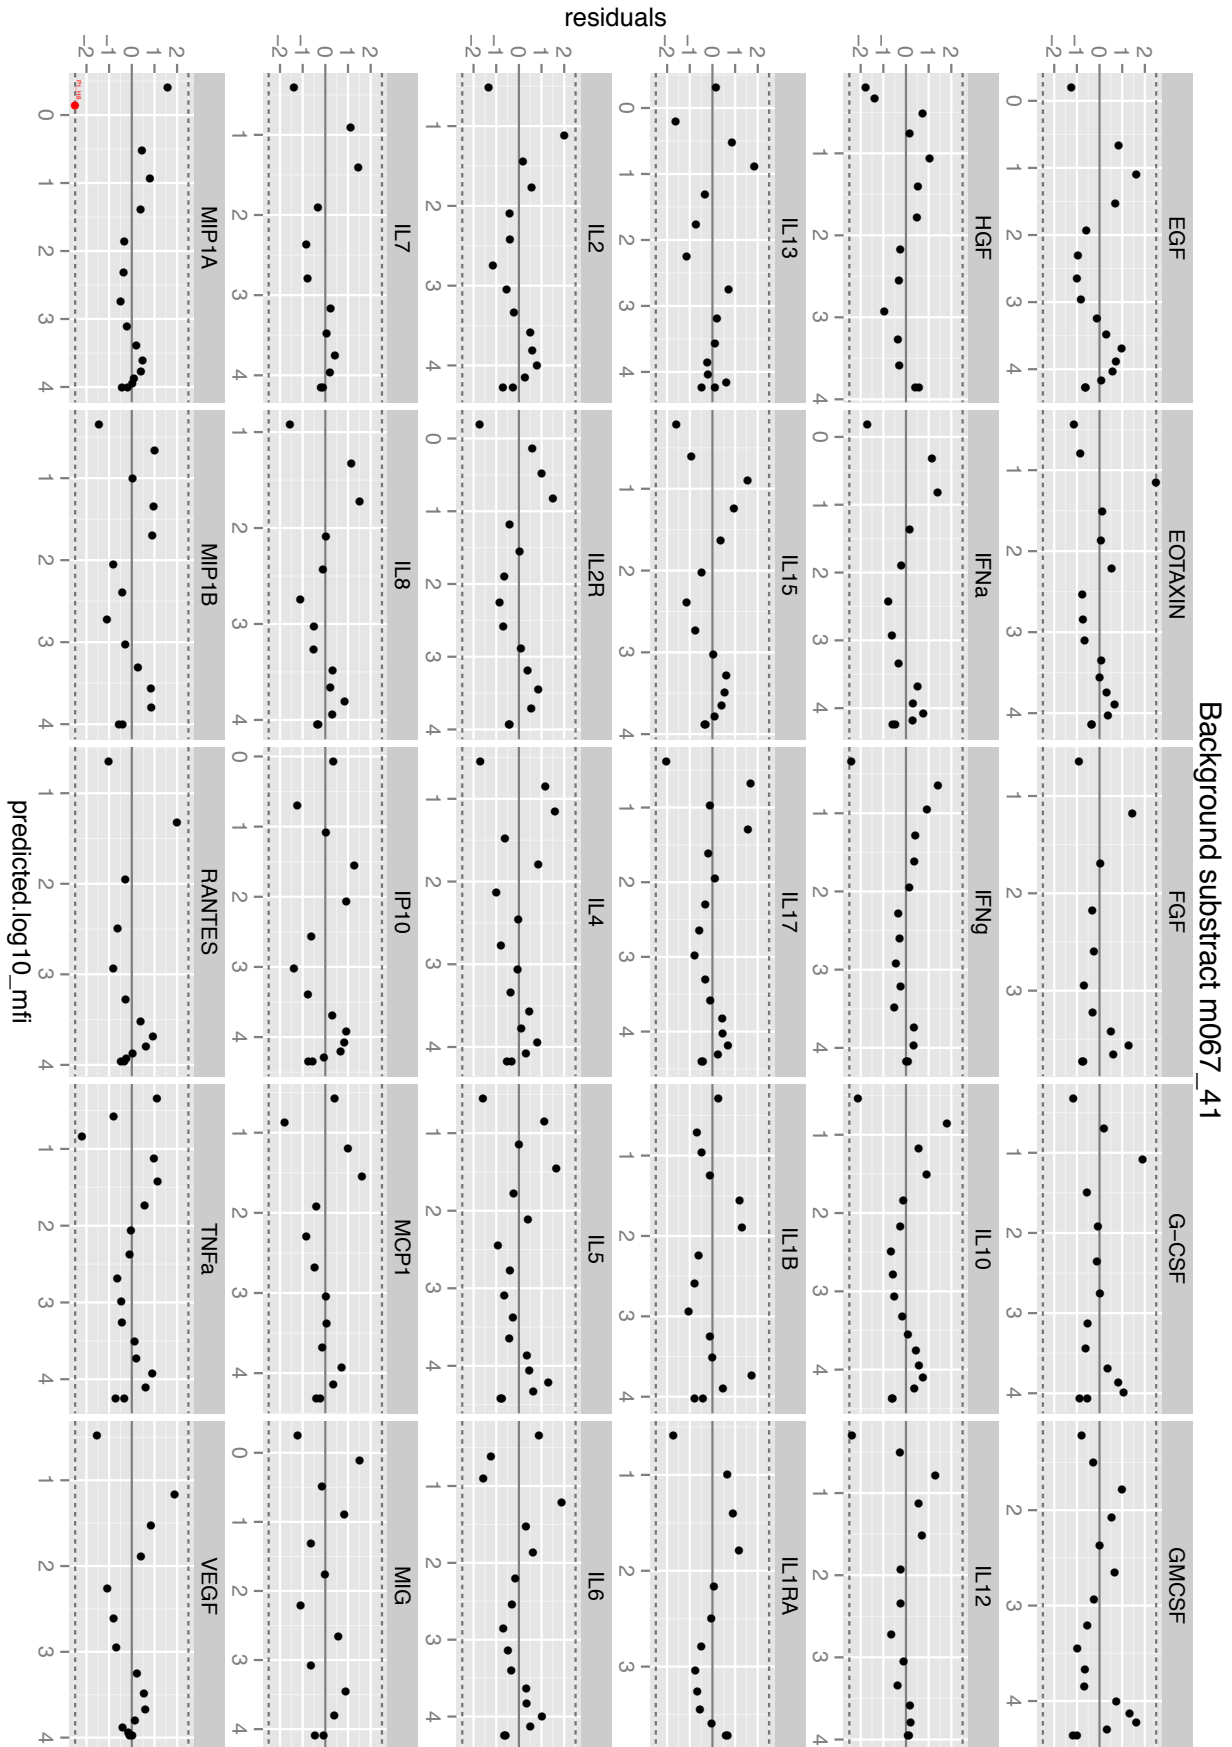

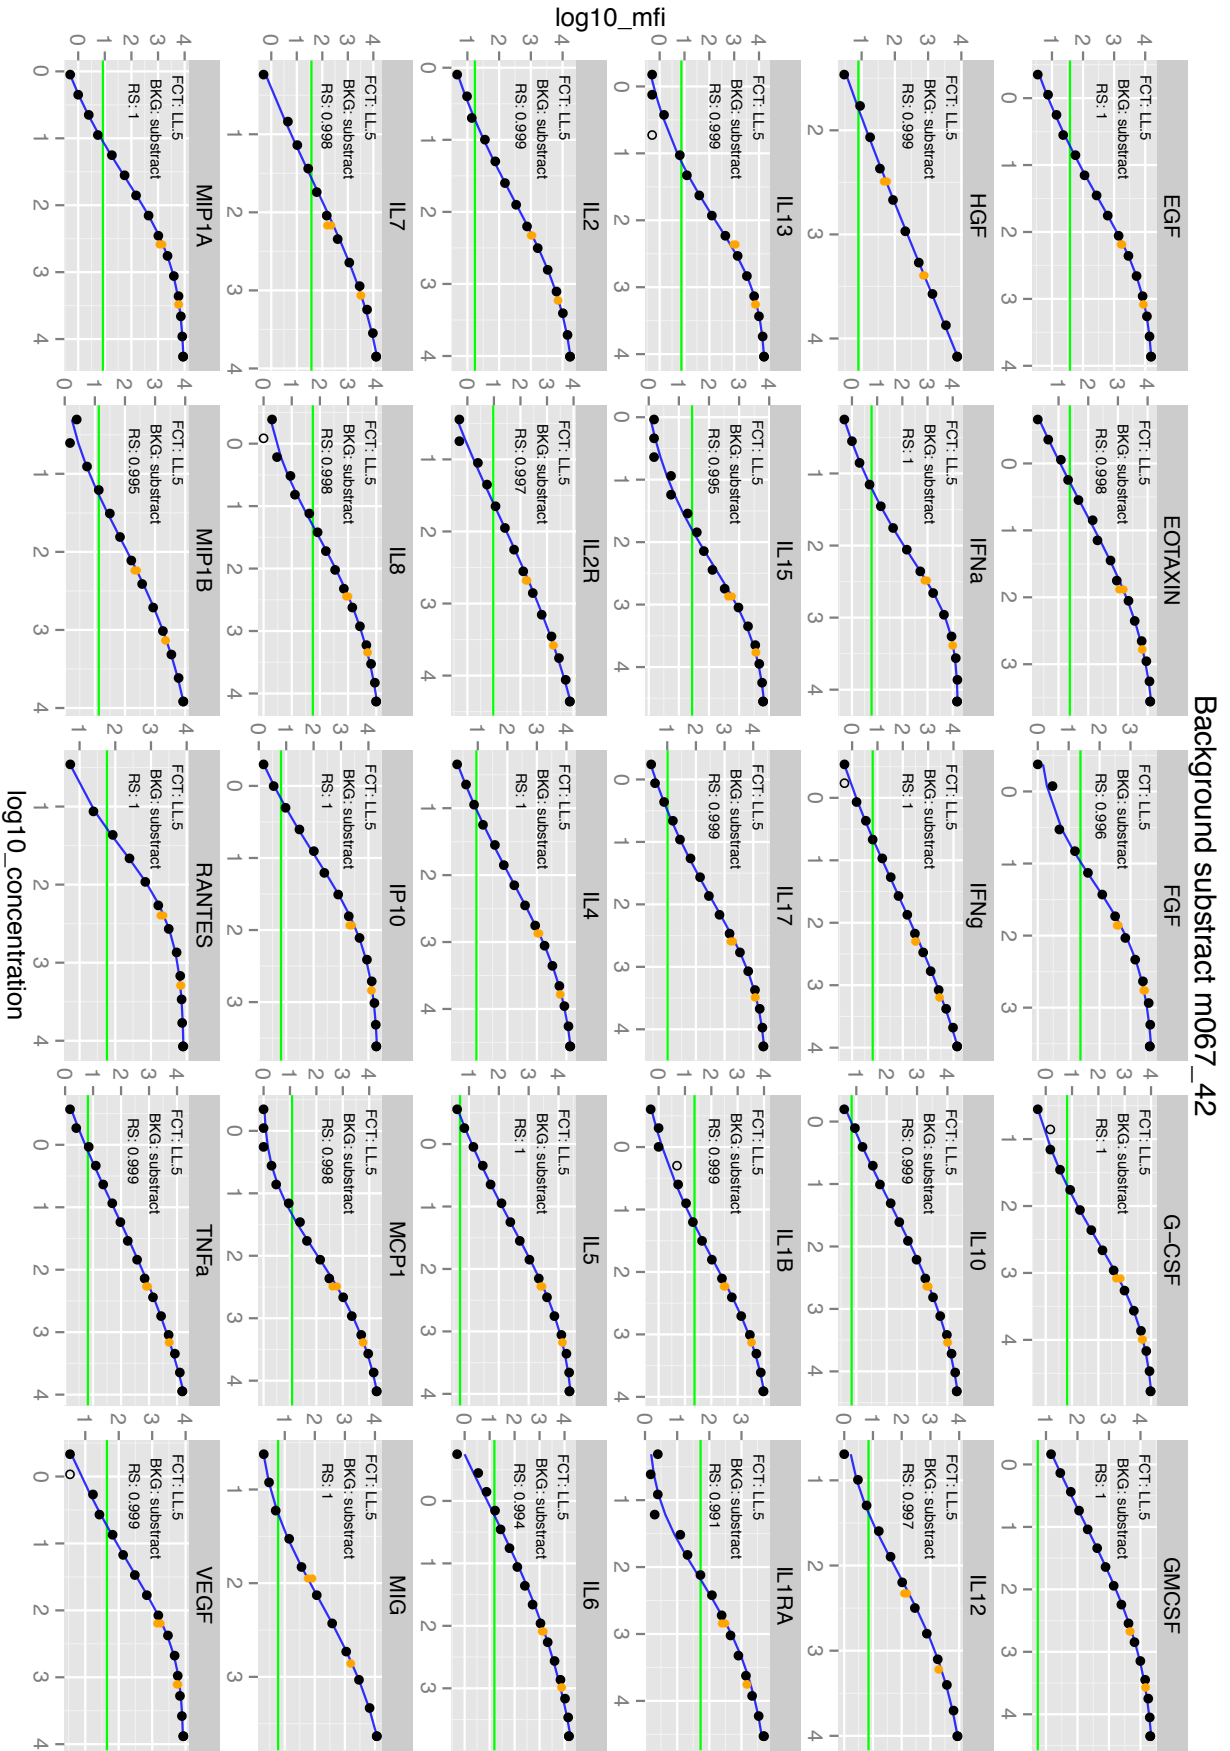

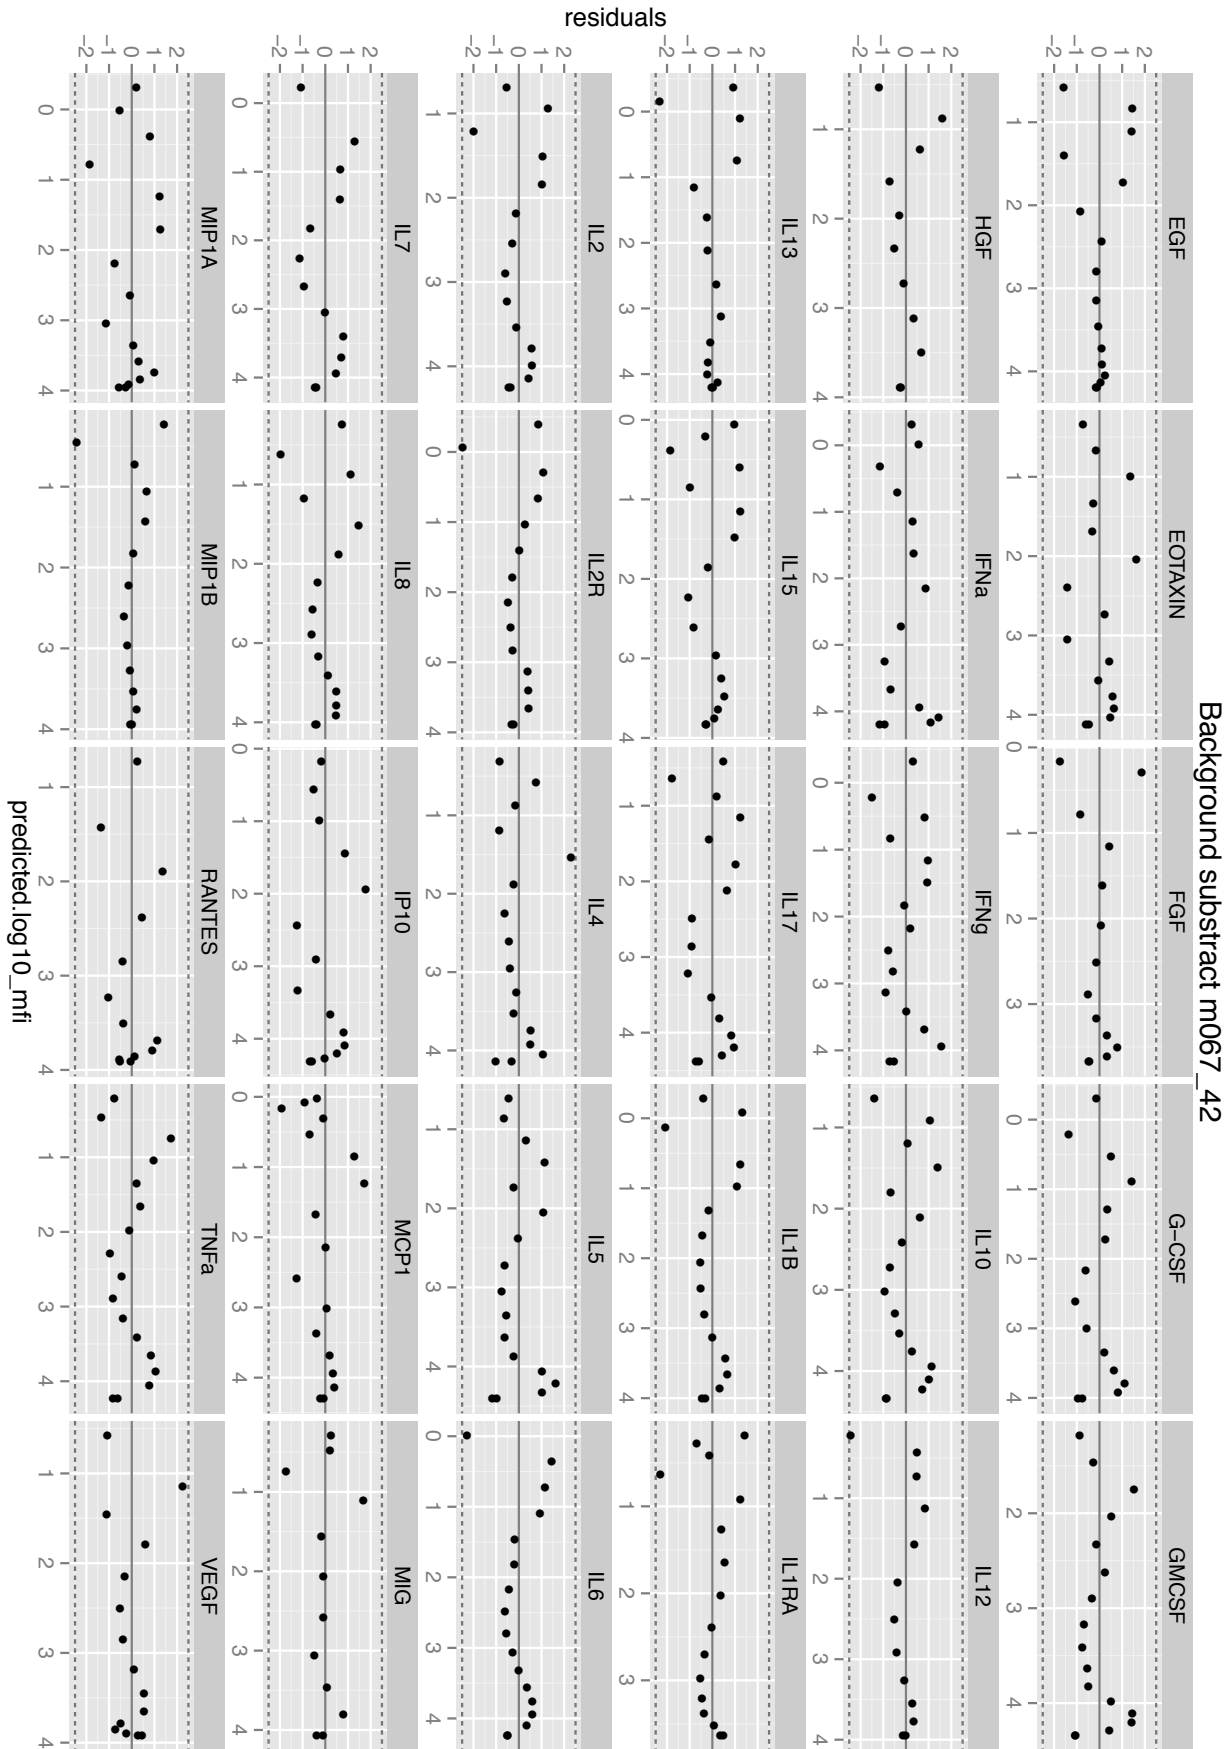

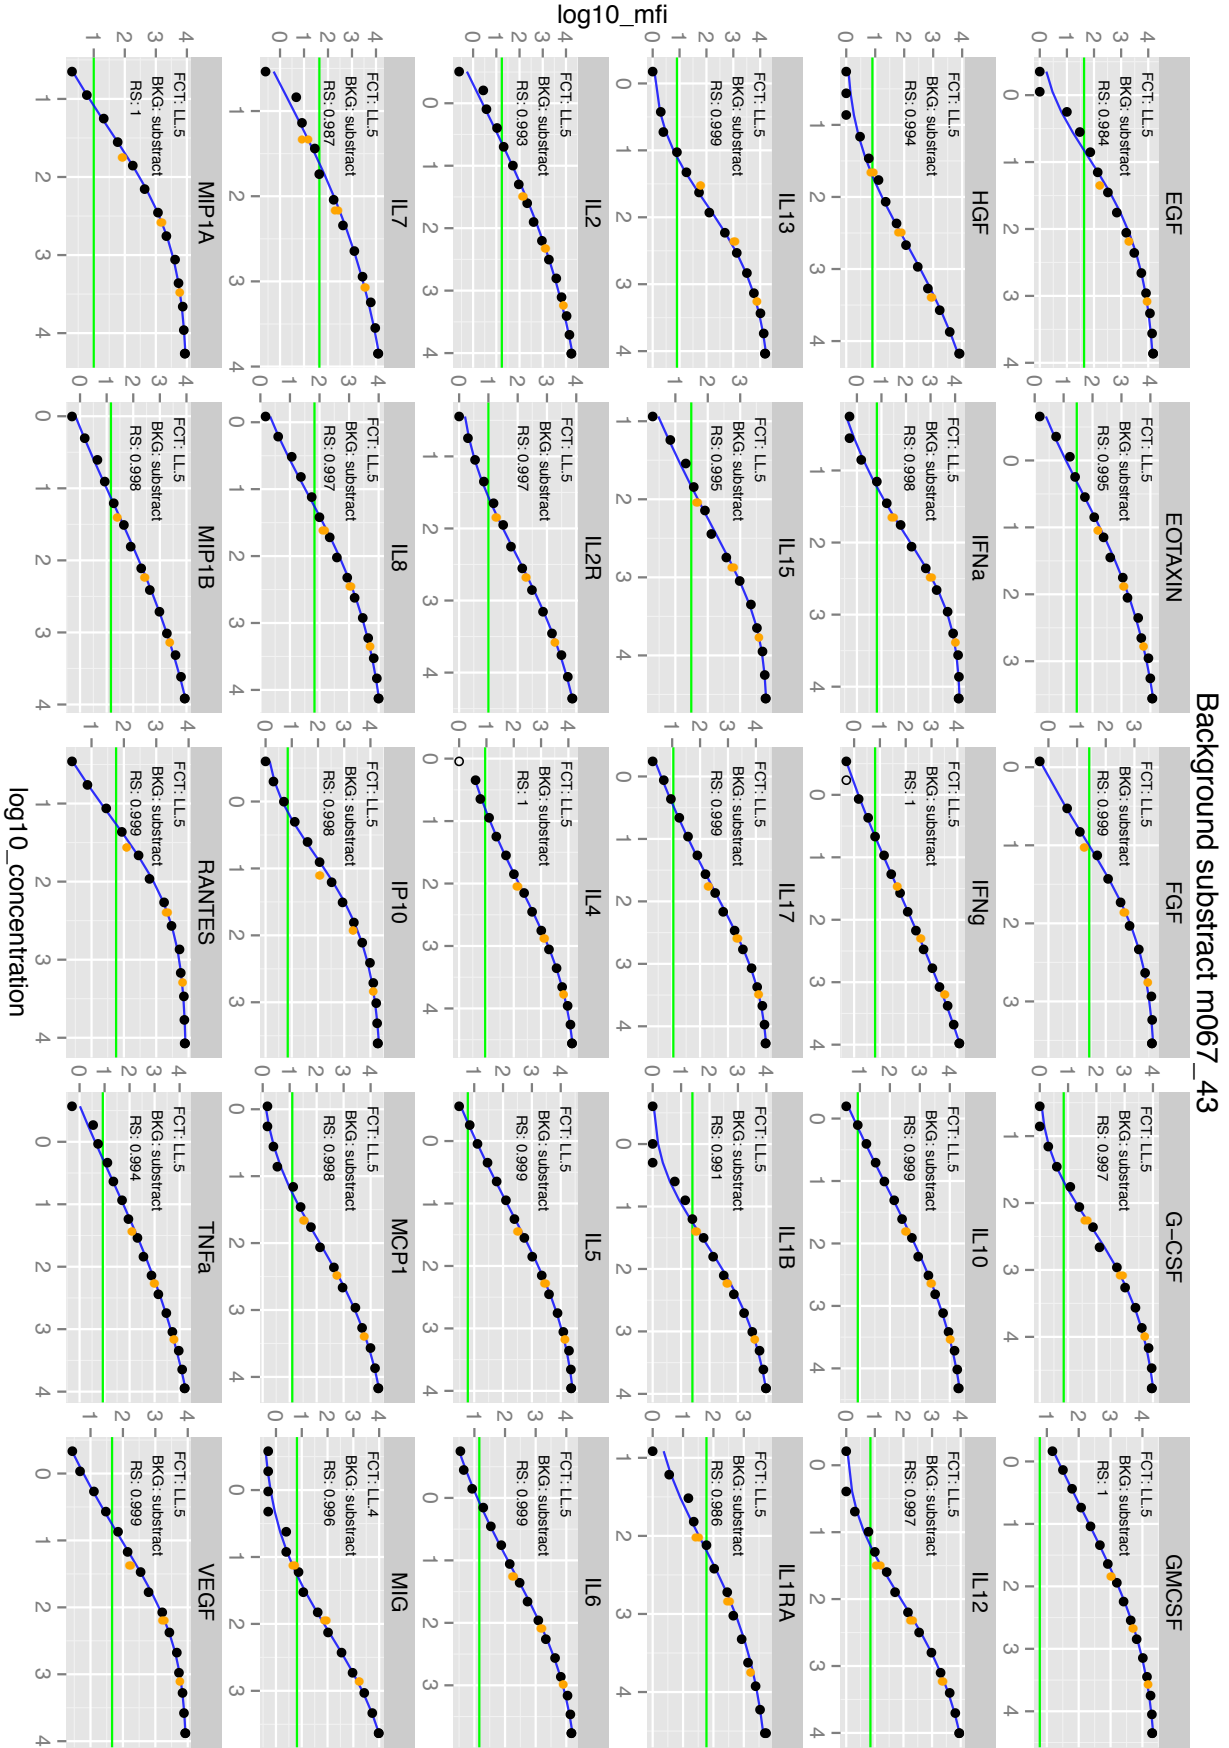

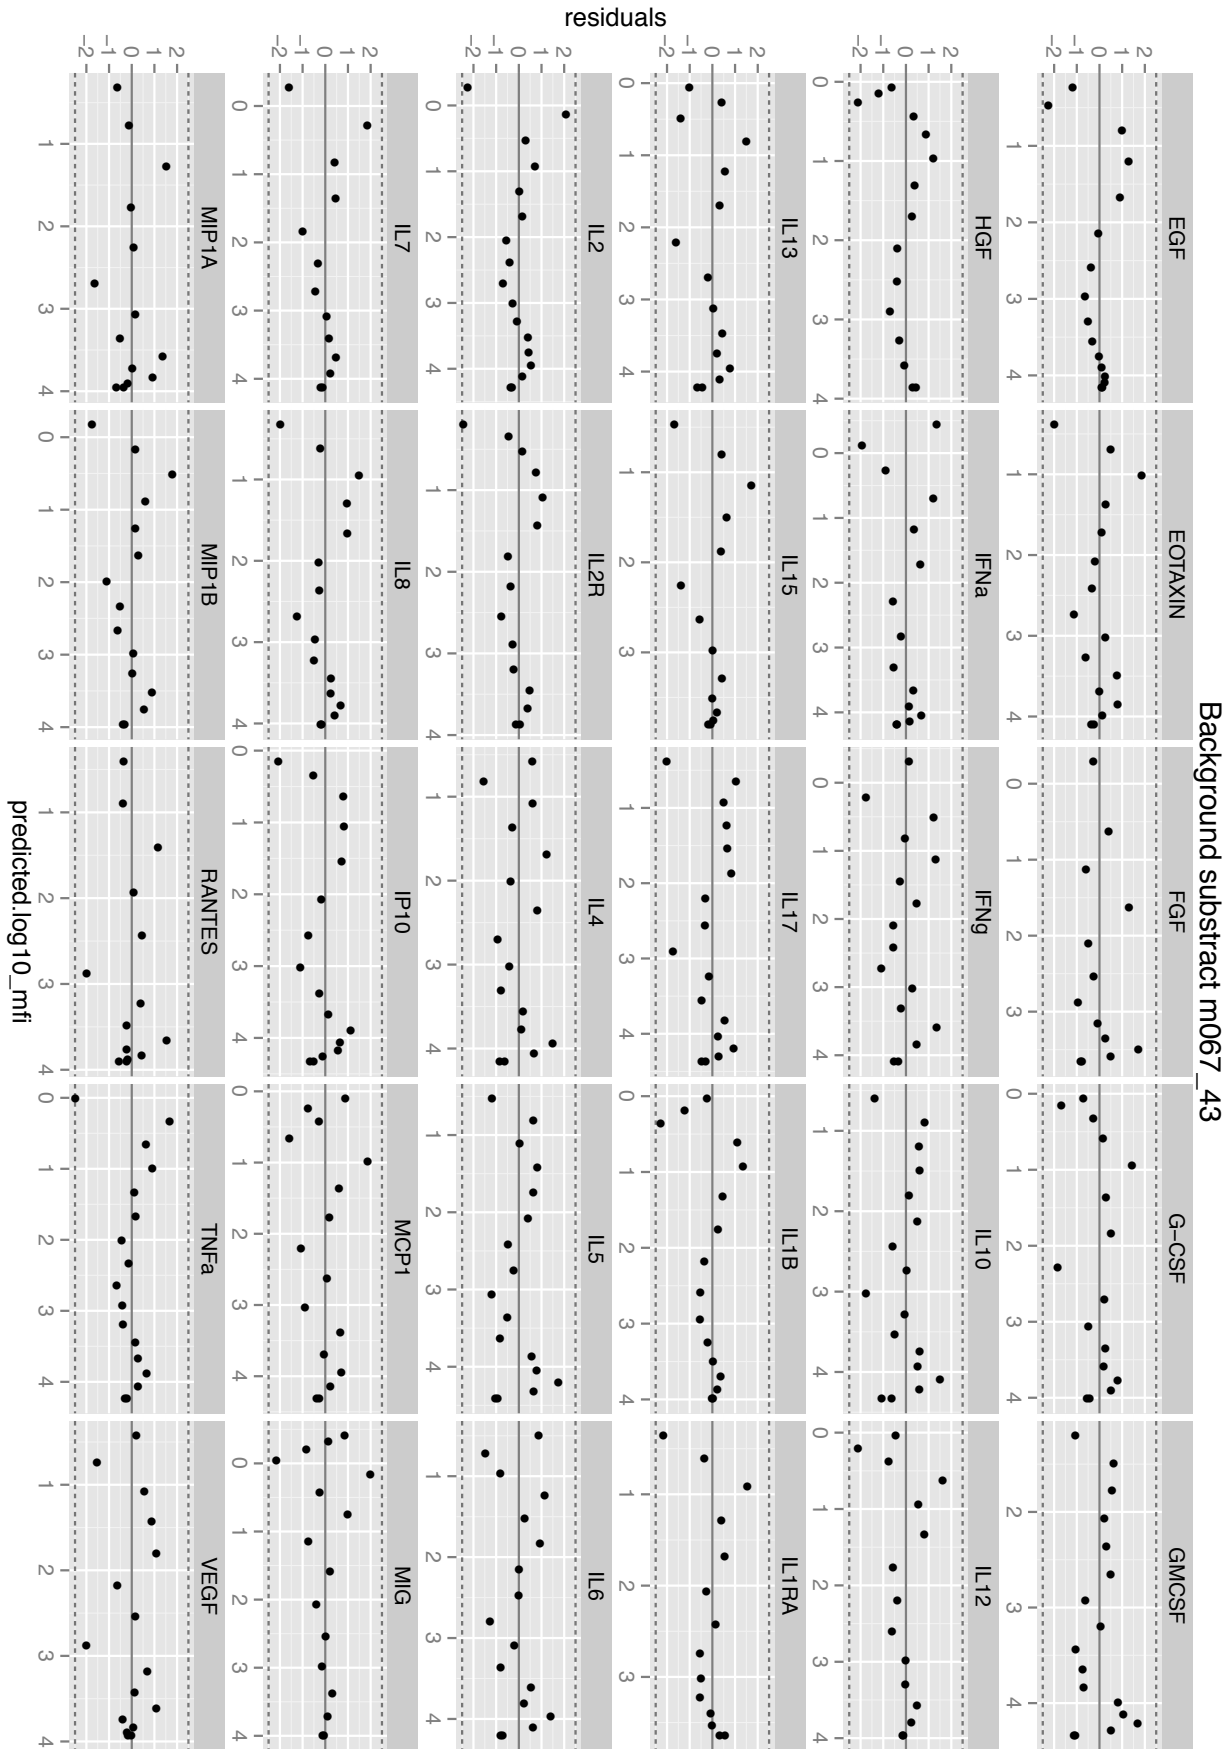

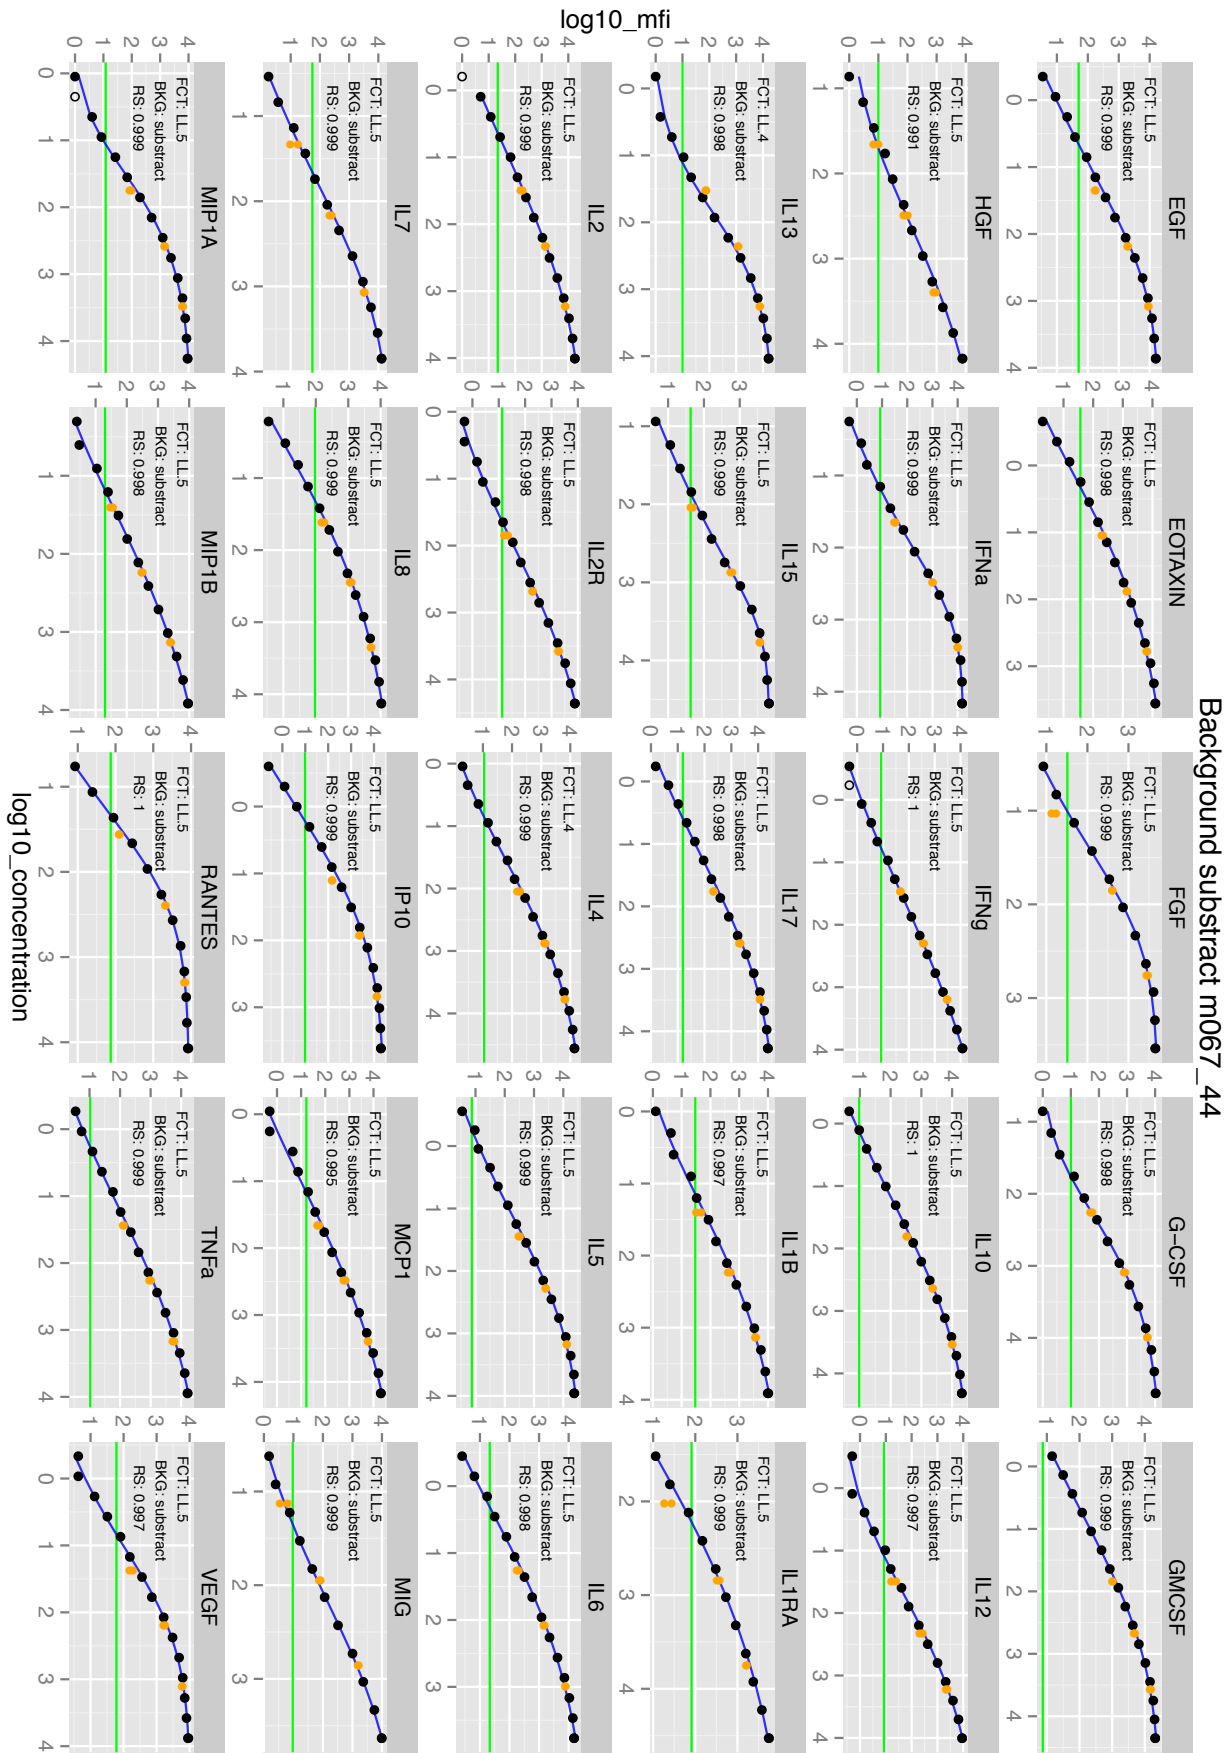

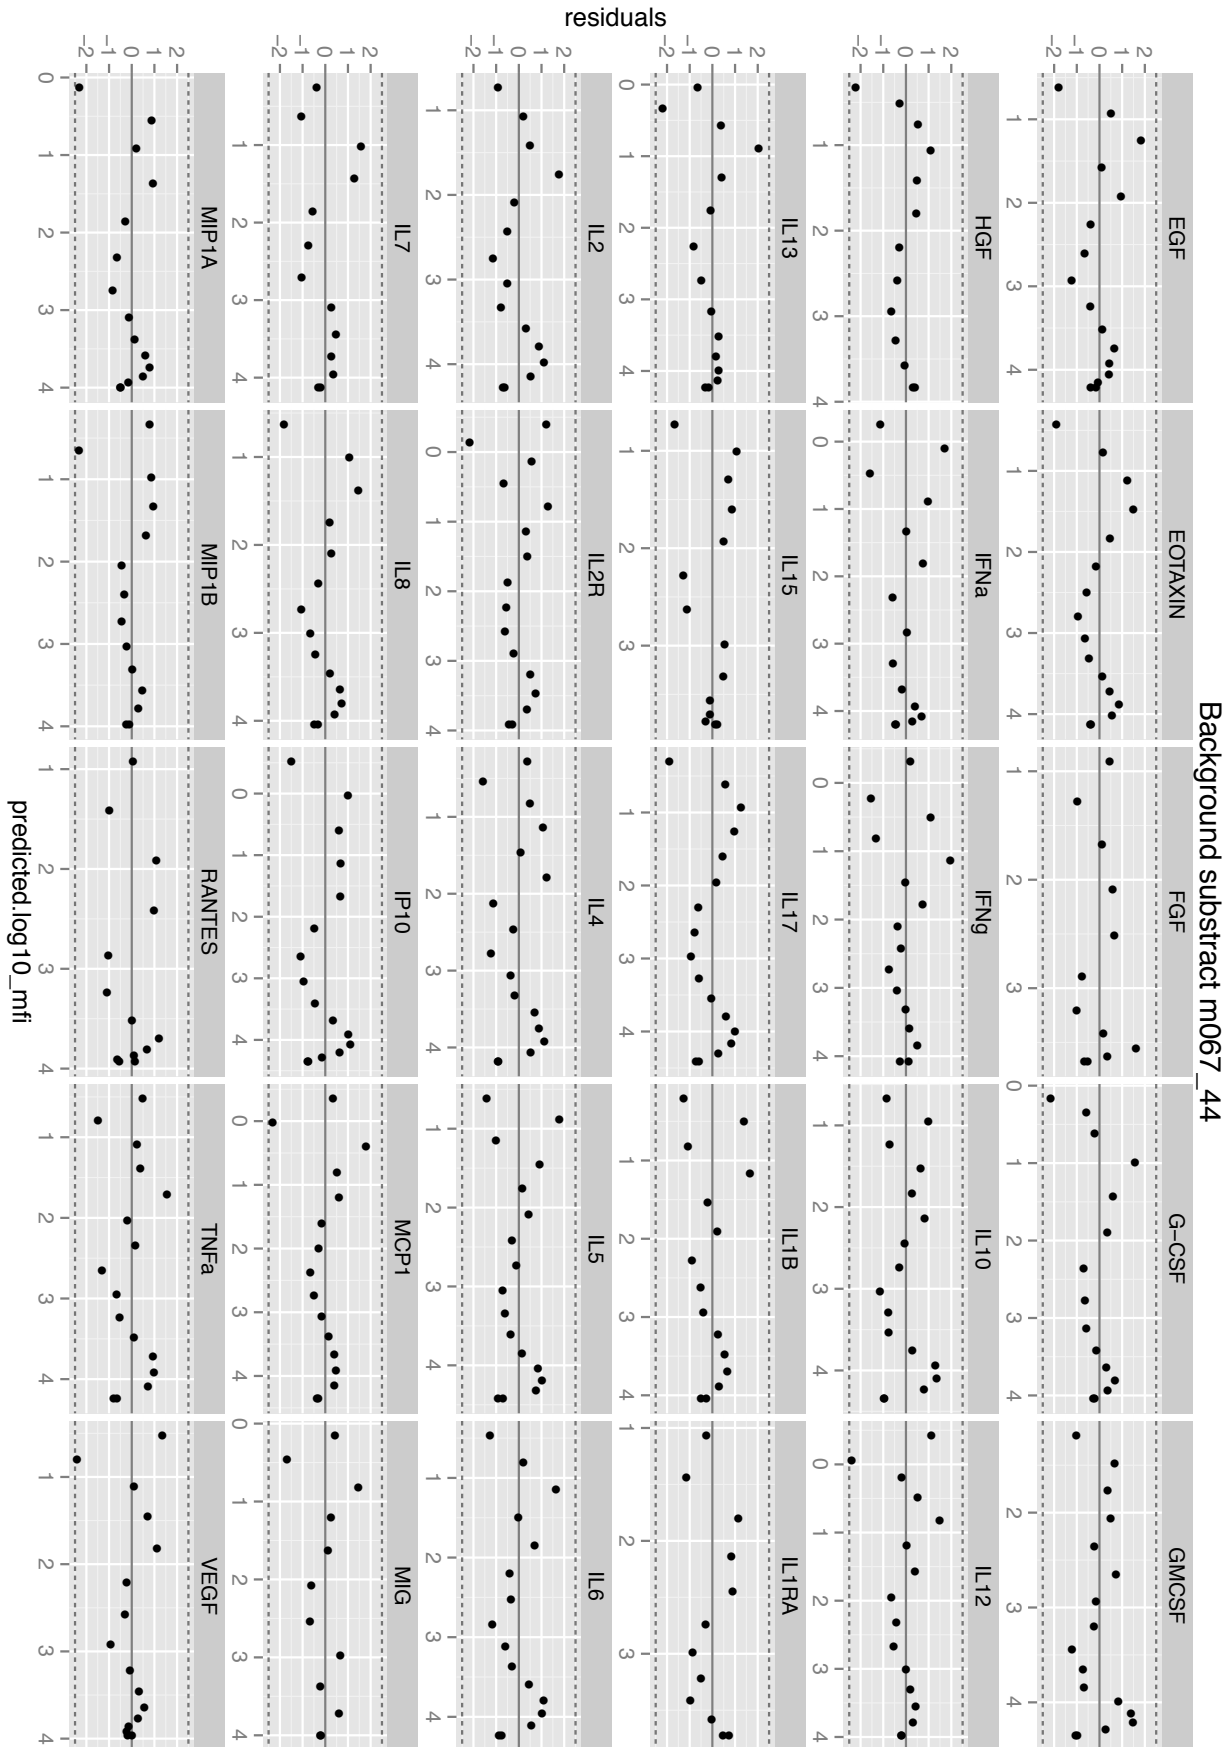



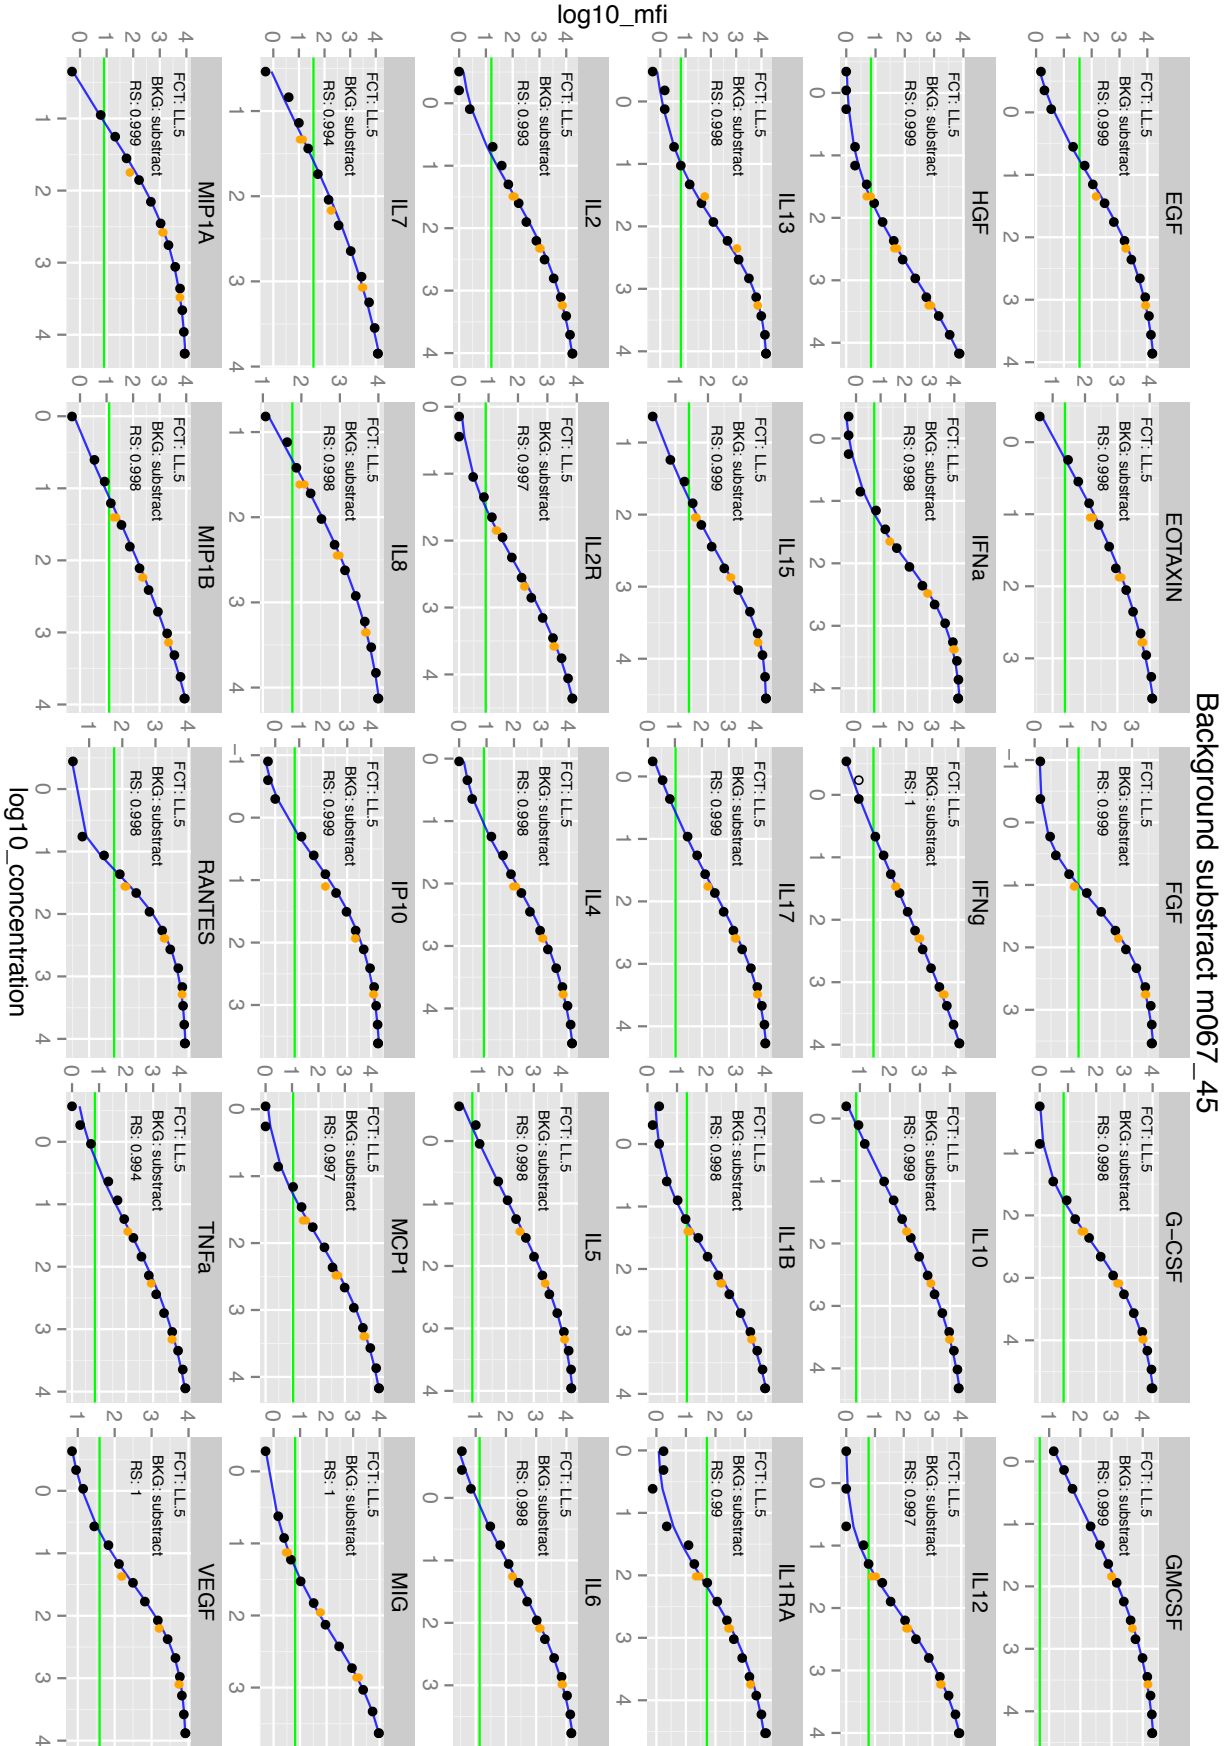

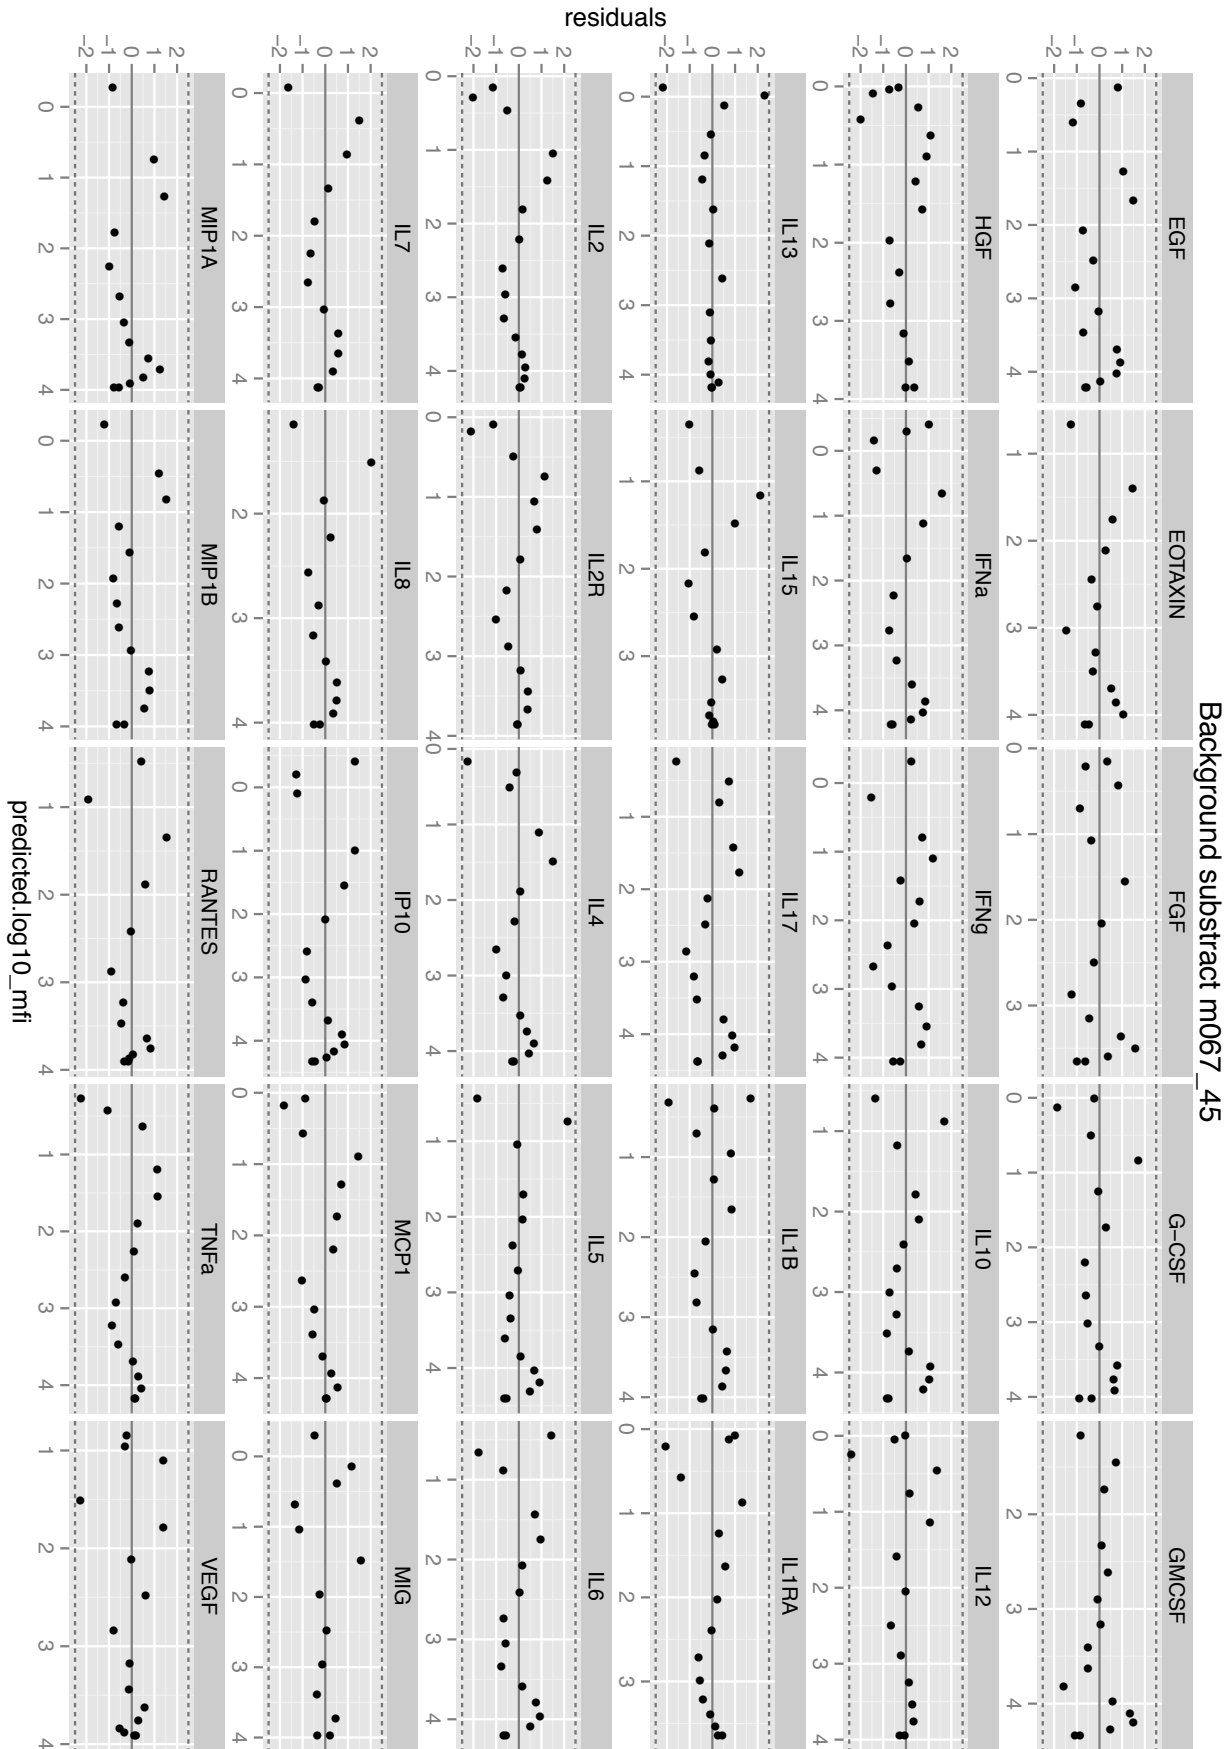

Supplement: pone.0187901.s003.pdf [file pone.0187901.s003.pdf]
